1 **J. Bacteriol.**

2

3 **Regulatory small RNA, Qrr2, is expressed independently of**  
4 **sigma factor-54 and functions autonomously in *Vibrio***  
5 ***parahaemolyticus* to control quorum sensing**

6

7

8 **Tague, J.G., J. Hong, S.S. Kalburge, and E.F. Boyd\***

9 **Department of Biological Sciences, University of Delaware, Newark, DE, 19716**

10

11 Corresponding author\*

12 Dr. E. Fidelma Boyd

13 Department of Biological Sciences

14 University of Delaware

15 Newark, DE 19716

16 Phone: (302) 831-1088. Fax: (302) 831-2281 Email: [fboyd@udel.edu](mailto:fboyd@udel.edu)

17

## 18 Abstract

19 Bacterial cells alter gene expression in response to changes in population density in a  
20 process called quorum sensing (QS). In *Vibrio harveyi*, LuxO, a low cell density activator  
21 of sigma factor-54 (RpoN), is required for transcription of five non-coding regulatory  
22 sRNAs, Qrr1-Qrr5, which each repress translation of the master QS regulator LuxR.  
23 *Vibrio parahaemolyticus*, the leading cause of bacterial seafood-borne gastroenteritis, also  
24 contains five Qrr sRNAs that control OpaR (the LuxR homolog), required for capsule  
25 polysaccharide (CPS) and biofilm production, motility, and metabolism. We show that  
26 in a  $\Delta luxO$  deletion mutant, *opaR* was de-repressed and CPS and biofilm were  
27 produced. However, in a  $\Delta rpoN$  mutant, *opaR* was repressed, no CPS was produced,  
28 and less biofilm production was observed compared to wild type. To determine why  
29 *opaR* was repressed, expression analysis in  $\Delta luxO$  showed all five *qrr* genes were  
30 repressed, while in  $\Delta rpoN$  the *qrr2* gene was significantly de-repressed. Reporter assays  
31 and mutant analysis showed Qrr2 sRNA can act autonomously to control OpaR.  
32 Bioinformatics analysis identified a sigma-70 (RpoD) -35 -10 promoter overlapping the  
33 canonical sigma-54 (RpoN) promoter in the *qrr2* regulatory region. Mutagenesis of the  
34 sigma-70 -10 promoter site in the  $\Delta rpoN$  mutant background, resulted in repression of  
35 *qrr2*. Analysis of *qrr* quadruple deletion mutants, in which only a single *qrr* gene is  
36 present, showed that only Qrr2 sRNA can act autonomously to regulate *opaR*. Mutant  
37 and expression data also demonstrated that RpoN and the global regulator Fis act

38 additively to repress *qrr2*. Our data has uncovered a new mechanism of *qrr* expression  
39 and shows that Qrr2 sRNA is sufficient for OpaR regulation.

40

#### 41 **Importance**

42 The quorum sensing non-coding sRNAs are present in all *Vibrio* species but vary in  
43 number and regulatory roles among species. In the Harveyi clade, all species contain  
44 five *qrr* genes that, in *V. harveyi*, are additive in function to control LuxR. In the  
45 Cholerae clade, four *qrr* genes are present, and in *V. cholerae* the *qrr* genes are redundant  
46 in function to control HapR (the LuxR homolog). Here, we show that in *V.*  
47 *parahaemolyticus*, only *qrr2* can function autonomously to control OpaR, and it is  
48 controlled by two overlapping promoters. The *qrr2* sigma-70 promoter is present in all  
49 strains of *V. parahaemolyticus* and in other members of the Harveyi clade suggesting a  
50 conserved mechanism of regulation.

51

52

## 53 Introduction

54 Bacteria monitor changes in cell density using a process termed quorum sensing (QS)  
55 (1, 2). QS is a regulatory mechanism used to alter global gene expression in response to  
56 cell density changes (1-6). In many Gram-negative bacteria, N-acylhomoserine lactone  
57 (AHL) is a common QS autoinducer synthesized intracellularly and secreted out of the  
58 cell (2, 7). By surveying AHL levels in its environment, a bacterium can regulate gene  
59 expression in response to growth phase. Quorum sensing has been characterized in  
60 several marine species in the genus *Vibrio*, including *V. anguillarum*, *V. cholerae*, *V.*  
61 *harveyi* and *V. parahaemolyticus*, and shown to modulate expression of bioluminescence,  
62 capsule formation, biofilm, natural competence, swarming motility, and virulence (5, 7-  
63 21). In *V. harveyi* and *V. anguillarum*, it was shown that LuxO, the QS response regulator,  
64 is an activator of sigma factor-54, encoded by *rpoN* that along with RNA polymerase,  
65 initiates transcription of the non-coding quorum regulatory small RNAs (Qrr) (8, 22-23).

66 Non-coding sRNAs are a group of regulators present in prokaryotes that  
67 together with the RNA chaperone Hfq control gene expression in a range of phenotypes  
68 (24-26). The Qrr sRNAs are classified as *trans*-acting sRNAs that along with Hfq, target  
69 mRNA via base-pairing to the 5' UTR to stabilize or destabilize translation. In *V. harveyi*,  
70 the nucleoid structuring protein Fis was shown to be a positive regulator of *qrr* gene  
71 expression (27). The Qrr sRNAs are post-transcriptional regulators that, in *V. harveyi*,  
72 enhanced translation of the QS low cell density (LCD) master regulator AphA and

73 inhibited translation of the QS high cell density (HCD) master regulator LuxR (28-31).  
74 At HCD in *V. harveyi*, LuxO is not phosphorylated and therefore cannot activate sigma-  
75 54 (RpoN), the five Qrr sRNA genes *qrr1* to *qrr5* are not transcribed, and LuxR  
76 translation is de-repressed. In addition, AphA and LuxR repress each other  
77 transcriptionally, providing a further level of regulation (30, 32-34). Studies have shown  
78 that in *V. harveyi*, Qrr1 has a 9-bp deletion in the 5' region of the sRNA and therefore  
79 cannot activate *aphA* translation but can still repress *luxR* translation. The deletion in  
80 *qrr1* is also present in *V. cholerae*, *V. parahaemolyticus* and several other *Vibrio* species (30,  
81 35). In *V. harveyi*, Qrr2, Qrr3, Qrr4, and Qrr5 sRNAs were additive in function and  
82 controlled the same target sites (29, 36, 37). However, the *qrr* genes showed distinct  
83 expression patterns and controlled the QS output signal at different levels coordinated  
84 with highest to lowest expression: Qrr4 > Qrr2 > Qrr3 > Qrr1 > Qrr5 (29). *V. cholerae*  
85 encodes four Qrr sRNAs, Qrr1 to Qrr4 that were redundant in function with any one of  
86 the four Qrr sRNAs sufficient to repress HapR (the LuxR homolog) (37).

87 *Vibrio parahaemolyticus* (VP) is a halophile, residing in marine environments as  
88 free-living organisms or in association with marine flora and fauna (38-40). This species  
89 is the leading cause of seafood-borne bacterial gastroenteritis worldwide, causing  
90 increasing infections each year, and is also a serious pathogen in the aquaculture  
91 industry (41, 42). *Vibrio parahaemolyticus* has dual flagellar systems, with the lateral  
92 flagellum system required for swarming motility, an important multicellular behavior

93 (43). *Vibrio parahaemolyticus* has the same QS components and pathway as *V. harveyi*,  
94 containing five Qrr sRNAs that are predicted to control *aphA* and *luxR* (Fig. 1). In this  
95 species, the LuxR homolog is named OpaR (Opacity Regulator), for its role as an  
96 activator of capsule polysaccharide (CPS) production that results in an opaque, rugose  
97 colony morphology (44). A  $\Delta opaR$  mutant has a translucent, smooth colony morphology  
98 and does not produce CPS nor a robust biofilm (14, 16, 44, 45). Besides CPS and biofilm  
99 formation, OpaR has also been shown to regulate swimming and swarming motility,  
100 surface sensing, metabolism, and the osmotic stress response in this species (14, 15, 20,  
101 46-49). A *V. parahaemolyticus*  $\Delta luxO$  deletion mutant, in which the *qrr* sRNAs were not  
102 expressed, showed *opaR* was highly induced and produced both CPS and biofilm,  
103 output signals of the QS pathway (14). Interestingly, an earlier study examining an  
104  $\Delta rpoN$  deletion mutant in *V. parahaemolyticus* showed that it did not produce CPS nor  
105 biofilm (50). This is unexpected because previous studies in *V. harveyi* suggest that in a  
106  $\Delta rpoN$  mutant the *qrr* sRNA would not be expressed and therefore *luxR* (*opaR*) would be  
107 de-repressed and production of CPS and biofilm would be observed.

108 Here, we examined mutants of the QS pathway in *V. parahaemolyticus* to  
109 determine why the QS pathway output phenotypes differ between the  $\Delta luxO$  and  $\Delta rpoN$   
110 mutants. We examined single and double mutants of  $\Delta luxO$  and  $\Delta rpoN$  for CPS and  
111 biofilm formation. We demonstrate that the  $\Delta luxO$  mutant produces CPS and biofilm,  
112 whereas the  $\Delta rpoN$  and  $\Delta rpoN/\Delta luxO$  mutants do not, suggesting *opaR* is repressed. We

113 determined the expression patterns of *opaR*, *aphA* and the five *qrr* genes in these  
114 mutants and from this data, we determined that *qrr2* was de-repressed in the  $\Delta rpoN$   
115 mutant and *opaR* was repressed. Deletion of *qrr2* in the  $\Delta rpoN$  mutant background  
116 resulted in *opaR* expression and restored CPS and biofilm production, demonstrating  
117 that Qrr2 sRNA is responsible for the  $\Delta rpoN$  mutant CPS defect phenotype.

118 Bioinformatics analysis of the *qrr2* regulatory region identified an RpoD-35 -10  
119 promoter region that overlaps with the RpoN -24 -12 promoter suggesting a mechanism  
120 by which *qrr2* is expressed in the *rpoN* mutant. We performed mutagenesis of the  
121 putative -10 promoter site and showed that *qrr2* expression was repressed indicating that  
122 *qrr2* can be transcribed from this promoter. To determine whether the other Qrr sRNAs  
123 can also function independently, we constructed quadruple *qrr* mutants, in which only  
124 one *qrr* is present, and examined CPS and motility phenotypes. Only the quad mutant  
125 containing *qrr2* could recapitulate wild type phenotypes, indicating that it can act  
126 autonomously to regulate OpaR. Furthermore, in a sigma-54 and Fis double mutant  
127 ( $\Delta rpoN/\Delta fis$ ), *qrr2* was more highly expressed than in a single  $\Delta rpoN$  mutant, suggesting  
128 that both RpoN and Fis act together to repress *qrr2* transcription by sigma-70. Sequence  
129 comparative analysis showed that -35 and -10 promoter sites were conserved among  
130 species within the Harveyi clade. Overall, our data show that Qrr2 can function  
131 independently and has a novel mechanism of expression in *V. parahaemolyticus*.

132 **Results:**

133 **Differential expression of *opaR* and *aphA* in  $\Delta luxO$  versus  $\Delta rpoN$  mutants.** We used  
134 CPS production as a readout of OpaR presence in the *V. parahaemolyticus* cell. Based on  
135 the quorum sensing pathway in *V. harveyi*, we would expect both a  $\Delta luxO$  and  $\Delta rpoN$   
136 deletion mutant to produce CPS, as the Qrr sRNAs should not be transcribed, and  
137 therefore OpaR should be de-repressed (**Fig. 1**). In a CPS assay, the  $\Delta luxO$  mutant  
138 produced CPS forming opaque, rugose colonies. However, the  $\Delta rpoN$  mutant did not  
139 produce CPS, instead forming a translucent, smooth colony morphology, similar to the  
140  $\Delta opaR$  strain (**Fig. 2A**). In addition, a  $\Delta rpoN/\Delta luxO$  double mutant also lacked CPS and  
141 produced a translucent, smooth colony morphology. Similarly, when we examined  
142 biofilm formation, both the  $\Delta rpoN$  and  $\Delta rpoN/\Delta luxO$  double mutant strains produced  
143 less biofilm than the wild type and  $\Delta luxO$  strains (**Fig. 2B**). These data suggest that in  
144 the  $\Delta rpoN$  mutant, *opaR* is repressed. To test this, we complemented the  $\Delta rpoN$  mutant  
145 with the *opaR* gene expressed from an arabinose promoter (pBAD*opaR*), and in these  
146 cells CPS production was restored, indicating that the absence of *opaR* in the  $\Delta rpoN$   
147 mutant led to the CPS defect (**Fig. S1**).

148         Next, we investigated the expression profiles of the QS master regulators in the  
149  $\Delta luxO$  and  $\Delta rpoN$  deletion mutants. RNA isolation and quantitative real-time PCR  
150 (qPCR) assays were performed from cells grown in LB 3% NaCl to optical densities  
151 (OD) 0.1 and 0.5. At OD 0.1, expression of *opaR* in  $\Delta luxO$  relative to wild type was  
152 significantly upregulated, however, *opaR* expression was unchanged in the  $\Delta rpoN$



153 mutant (**Fig. 3A**). At OD 0.5, expression of *opaR* in  $\Delta luxO$  matched that of wild type,  
154 however, in the  $\Delta rpoN$  mutant expression of *opaR* was significantly downregulated  
155 relative to wild type (**Fig. 3B**). Expression of *aphA*, the low cell density QS master  
156 regulator, was repressed in the  $\Delta luxO$  mutant compared to wild type and unchanged in  
157 the  $\Delta rpoN$  mutant at OD 0.1 (**Fig. 3C**). At OD 0.5, *aphA* expression was upregulated  
158 compared to wild type in  $\Delta rpoN$  (**Fig. 3D**). These data indicate that *opaR* is repressed in  
159 the  $\Delta rpoN$  deletion mutant.

160 **Expression analysis of *qrr1-qrr5* in  $\Delta luxO$  and  $\Delta rpoN$  mutants.** Since *opaR* showed  
161 different levels of expression in the  $\Delta luxO$  and  $\Delta rpoN$  deletion mutants, we wanted to  
162 determine whether this was due to differences in *qrr* expression levels. We examined  
163 expression of all five *qrr* genes in cells grown to OD 0.1 and OD 0.5 and show that the  
164 expression of *qrr1*, *qrr2*, *qrr3* and *qrr5* was higher at OD 0.1 relative to OD 0.5 (**Fig. S2**).  
165 Expression of *qrr4* was detected at OD 0.1 but was not detected at OD 0.5 in wild type.  
166 In addition, *qrr4* expression was not detected in either  $\Delta luxO$  or  $\Delta rpoN$  at OD 0.1 or 0.5.  
167 Next, we examined expression of the *qrr* genes at OD 0.1 in the  $\Delta luxO$  mutant relative to  
168 wild type and showed *qrr1* expression was unchanged and there was significant  
169 downregulation of *qrr2*, *qrr3*, and *qrr5* (**Fig 4A**). Whereas at OD 0.5, their expression  
170 matched that of wild type (**Fig. 4B**). In the  $\Delta rpoN$  mutant, expression of *qrr1*, *qrr3*, and  
171 *qrr5* matched that of the  $\Delta luxO$  mutant (**Fig. 4C**), however, *qrr2* was upregulated at both  
172 OD 0.1 and OD 0.5 (**Fig. 4D**). To confirm that *qrr2* was differentially regulated between

173  $\Delta luxO$  and  $\Delta rpoN$ , the *qrr2* regulatory region was cloned into pRU1064 reporter vector  
174 upstream of a promoter-less *gfp* cassette (*Pqrr2-gfp*). The specific fluorescence of *Pqrr2-*  
175 *gfp* was examined in the wild type,  $\Delta luxO$ , and  $\Delta rpoN$  mutants and measured as a  
176 cumulative read-out of *qrr2* transcription (**Fig. 5A**). The level of specific fluorescence of  
177 *Pqrr2-gfp* was reduced in the  $\Delta luxO$  mutant relative to wild type, whereas in the  $\Delta rpoN$   
178 mutant, fluorescence was significantly increased (**Fig. 5A**). Next, we examined the *opaR*  
179 regulatory region cloned into pRU1064 reporter vector upstream of a promoter-less *gfp*  
180 cassette (*PopaR-gfp*) in wild type, a  $\Delta qrr2$  single mutant and a  $\Delta qrr3,1,4,5$  quadruple  
181 mutant with only *qrr2* present (**Fig. 5B**). In  $\Delta qrr2$  compared to wild type, *PopaR-gfp*  
182 showed significantly increased fluorescence, whereas the quadruple *qrr* deletion  
183 mutant, with *qrr2* present, was similar to wild type (**Fig. 5B**). We predicted that deletion  
184 of *qrr2* in the  $\Delta rpoN$  mutant background should restore *opaR* expression and CPS  
185 production. We constructed a  $\Delta rpoN/\Delta qrr2$  double mutant and examined *opaR* and *aphA*  
186 expression levels (**Fig. S3**). Quantitative real time PCR assays showed that *opaR* was  
187 highly expressed in a  $\Delta rpoN/\Delta qrr2$  double mutant compared to wild type (**Fig. S3**).  
188 Examination of CPS formation showed that the  $\Delta rpoN/\Delta qrr2$  double mutant produced a  
189 rough colony morphology (**Fig. S4A**). Similarly, in biofilm assays, the  $\Delta rpoN$  mutant  
190 produced a significantly reduced biofilm, whereas the  $\Delta rpoN/\Delta qrr2$  double mutant  
191 produced a biofilm similar to wild type (**Fig. S4B**). Overall, these data demonstrate that

192 Qrr2 sRNA is present in the  $\Delta rpoN$  deletion mutant and Qrr2 sRNA can function  
193 autonomously to control OpaR and QS phenotypes.

194 **Overlapping sigma-70 and sigma-54 promoters.** The expression of *qrr2* in the  $\Delta rpoN$   
195 mutant background indicates that an additional sigma factor can initiate *qrr2*  
196 transcription. To examine this further, the regulatory regions of *qrr1* to *qrr5* in *V.*  
197 *parahaemolyticus* RIMD2210633 were aligned and, using bioinformatics tools, surveyed  
198 for the presence of promoter regions. Although the five Qrr sRNAs share homology,  
199 their regulatory regions are divergent with the exception of the sigma-54 canonical -24  
200 (TTGGCA) and -12 (AATGCA) promoter sites, with nucleotides in bold conserved  
201 amongst all five *qrr* regulatory regions (**Fig. S5**). In the regulatory region of *qrr2*,  
202 promoter analysis identified a housekeeping sigma-70 (RpoD) -35 (TTGAAA) and -10  
203 (ATAATA) promoter (**Fig. 6A**). The putative sigma-70 promoter overlapped with the  
204 sigma-54 -24 and -12 promoter (**Fig. 6A**), and was absent from the regulatory regions of  
205 *qrr1*, *qrr3*, *qrr4*, and *qrr5* (**Fig. S5**). This suggested that *qrr2* can be transcribed by either  
206 sigma-54 or sigma-70 and could explain its expression in the absence of *rpoN*. To  
207 examine this further, we mutated three base-pairs of the putative sigma-70 -10  
208 ATAATA site to ATACCC in the pRUP*qrr2* reporter vector (**Fig. 6A**). The mutagenized  
209 vector, pRUP*qrr2*-10CCC, was conjugated into wild type and  $\Delta rpoN$  and specific  
210 fluorescence was determined. The  $\Delta rpoN$  pRUP*qrr2*-10CCC strain showed significantly  
211 reduced fluorescence relative to  $\Delta rpoN$  pRUP*qrr2*, indicating that this site is required for

212 *qrr2* transcription in the absence of RpoN (**Fig. 6B**). The data suggests that *qrr2* can be  
213 transcribed by two sigma factors using dual overlapping promoters, suggesting a  
214 unique mode of regulation for Qrr2 sRNA. Comparisons of the *qrr2* regulatory region  
215 among Harveyi clade species *V. alginolyticus*, *V. campbellii*, *V. harveyi*, and *V.*  
216 *parahaemolyticus* showed that the sigma-70 promoter -10 region was highly conserved  
217 among these species (**Fig. S6**). Each of the five Qrr sRNAs also shared homology among  
218 these species (**Fig. S7**). The *qrr1* gene among all four species showed high homology  
219 clustering closely together on the phylogenetic tree, but were distantly related to the  
220 other four *qrr* genes. The *qrr3* and *qrr4* genes each clustered tightly together on the tree  
221 whereas *qrr2* and *qrr5* each showed divergence among the species (**Fig. S7**). Overall  
222 divergence in regulatory regions and gene sequence amongst the *qrr* genes likely  
223 suggests differences in how each *qrr* gene is regulated and differences in the target  
224 genes of each Qrr sRNA.

225 **Qrr2 sRNA can function autonomously.** Next, we determined whether Qrr2 sRNA has  
226 a distinct role in this species and whether any of the four other *qrr* genes can act  
227 independently. Using a *qrr1-qrr5* quintuple deletion mutant ( $\Delta qrr$ -null) and five  
228 quadruple *qrr* deletion mutants, each containing a single *qrr*, we examined several QS  
229 phenotypes (**Fig. S8**). In swarming motility assays, the  $\Delta qrr$ -null strain was swarming  
230 deficient, as swarming is negatively regulated by OpaR (**Fig. S8A**). In addition, four  
231 quadruple mutants,  $\Delta qrr3,2,4,5$ ;  $\Delta qrr2,1,4,5$ ;  $\Delta qrr3,2,1,5$ ; and  $\Delta qrr3,2,1,4$  were all

232 swarming deficient indicating that Qrr1, Qrr3, Qrr4 and Qrr5 sRNAs cannot function  
233 independently to control this phenotype (**Fig. S8A**). In swarming motility assays, the  
234  $\Delta qrr3,1,4,5$  mutant that contained only *qrr2*, behaved similar to wild type and was  
235 swarming proficient (**Fig. S8A**). In swimming assays, the quad mutants that lacked *qrr2*  
236 produced similar results to the null mutant with defects in swimming (**Fig. S8B**).  
237 Whereas only  $\Delta qrr3,1,4,5$  that contains only *qrr2* showed swimming motility similar to  
238 wild type (**Fig. S8B**). Additionally, in CPS assays the *qrr2* positive strain also showed a  
239 colony morphology similar to wild type (**Fig. S8C**). Analysis of a single *qrr2* deletion  
240 mutant indicates that it is not essential for CPS production or swarming and that the  
241 other *qrr* genes can function in the absence of *qrr2* (**Fig. S9**). In summary, these data  
242 demonstrate that only Qrr2 sRNA can function independently in *V. parahaemolyticus*.

243 **RpoN and Fis are not required for *qrr2* expression.** In order to identify additional  
244 regulators of *qrr2* transcription, a DNA-affinity pull-down was performed. We used  
245  $\Delta rpoN$  cell lysate grown to OD 0.5 and P*qrr2* bait DNA. We identified a number of  
246 candidate regulators previously shown to bind to the *qrr* sRNA regulatory regions in *V.*  
247 *harveyi* (27, 34, 51) (**Fig. S10 and S11**). We decided to examine the nucleoid associated  
248 protein Fis further since it is known to be a positive regulator of *qrr* sRNA expression  
249 and binds to the *qrr* sRNA regulatory regions in *V. harveyi* (27). We identified three  
250 putative Fis binding sites in the *qrr2* regulatory region using virtual footprint analysis  
251 based off the *E. coli* Fis consensus sequence. A Fis binding site was located adjacent to

252 the -35 promoter site, as well as two additional Fis binding sites, at 193-bp and 229-bp  
253 upstream of the *qrr2* transcriptional start site (**Fig. 7A**). To confirm these Fis binding  
254 sites, we constructed four DNA probes of the *qrr2* regulatory region to use in  
255 electrophoretic shift mobility assays (EMSAs) with purified Fis protein. DNA probe 1  
256 encompassed the entire *qrr2* regulatory region and showed Fis binding in a  
257 concentration dependent manner via EMSA (**Fig 7B**). DNA probe 1A encompassing the  
258 single binding site showed binding in a concentration dependent manner, and similarly  
259 Fis bound to probe 1C which contained the two putative sites (**Fig. 7B**). Probe 1B, which  
260 did not have a putative Fis binding site, showed non-specific binding. Next, we  
261 examined expression of the *Pqrr2-gfp* reporter in wild type,  $\Delta rpoN$  and a  $\Delta rpoN/\Delta fis$   
262 double mutant and confirmed that expression of *Pqrr2-gfp* was upregulated in the  
263  $\Delta rpoN$  mutant but was even more highly upregulated in the  $\Delta rpoN/\Delta fis$  double mutant  
264 (**Fig. 7C**). These data indicate that both Fis and RpoN can act as repressors of *qrr2* in *V.*  
265 *parahaemolyticus*, and Fis likely plays a role in enhancing sigma-54 binding.

## 266 Discussion

267 In this study, we investigated the role of sigma-54, LuxO, and the five Qrr sRNAs in the  
268 *V. parahaemolyticus* QS pathway and showed that sigma-54, *qrr1*, *qrr3*, *qrr4*, and *qrr5*  
269 were not essential components. Our data demonstrated that in a  $\Delta rpoN$  mutant, cells  
270 had a defect in CPS and biofilm formation, QS phenotypes that differed from the  $\Delta luxO$   
271 mutant. The data showed that Qrr2 is highly expressed in a  $\Delta rpoN$  mutant and that Qrr2

272 can act autonomously to repress OpaR expression and QS phenotypes. In a  $\Delta rpoN/\Delta qrr2$   
273 double mutant, *opaR* was de-repressed and CPS and biofilm formation were restored.  
274 Bioinformatics analysis identified a putative -35 -10 promoter region within the *qrr2*  
275 regulatory region and mutagenesis of the -10 promoter sites resulted in repression of  
276 *qrr2*. Overall, the data indicate that *qrr2* can be expressed from two promoters, which is  
277 unique to *qrr2* in *V. parahaemolyticus*, but is likely true of related species. There have  
278 been other accounts of sigma-54-dependent genes showing increased transcription in  
279 the absence of *rpoN* (52, 53). In these cases, a putative sigma-70 promoter was present,  
280 suggesting a potential competition for promoter sites (52, 53). For example, in *E. coli*,  
281 *glmY* a coding sRNA contained overlapping sigma-54 and sigma-70 promoters, which  
282 were shown to allow for precise control of *glmY* expression within the cell (54). In our  
283 study, we identified a sigma-70 promoter that overlaps with the sigma-54 consensus  
284 promoter sequence of *qrr2*, suggesting that RpoN under differ growth conditions may  
285 block RpoD access. We propose that in the wild type background, *qrr2* is transcribed via  
286 LuxO activated RpoN, and in the  $\Delta luxO$  mutant, *qrr2* is not transcribed because sigma-  
287 54 is in an inactive state bound to the *qrr2* promoter, physically blocking additional  
288 sigma factors from binding. However, in the absence of sigma-54, sigma-70 is able to  
289 bind to the *qrr2* regulatory region at a conserved -35 and -10 region to initiate  
290 transcription (**Fig. 8**). Fis is a global regulator that is known to enhance and inhibit  
291 transcription from promoter regions in many bacterial species (55-58). In *V. harveyi*, Fis

292 has been shown to positively regulate *qrr* expression (27). Here, we show in DNA  
293 protein binding assays in *V. parahaemolyticus* that Fis binds adjacent to the -35 promoter  
294 site. We speculate that Fis functions to enhance RpoN promoter binding to maximize  
295 *qrr* expression. The data showed that in the absence of both RpoN and Fis, however,  
296 *qrr2* expression is significantly increased compared to the  $\Delta rpoN$  mutant alone. Under  
297 these conditions additional binding sites within the *qrr2* regulatory region may be fully  
298 exposed, allowing sigma-70 full access for increased *qrr2* expression (**Fig. 8**). A study in  
299 *V. alginolyticus* MVP01, a species closely related to *V. parahaemolyticus*, also showed  
300 differences between the  $\Delta luxO$  and  $\Delta rpoN$  mutant strains in their control of cell density  
301 dependent siderophore production. The  $\Delta luxO$  mutant showed reduced siderophore  
302 production, which is negatively regulated by LuxR, and the  $\Delta rpoN$  mutant showed  
303 increased production (59). Their data showed RpoN dependent and independent  
304 siderophore production. We speculate that this could be the result of expression by  
305 RpoD since *V. alginolyticus* has a -35 -10 promoter in the Qrr2 regulatory region (**Fig.**  
306 **S6**).

307 In *V. cholerae*, four Qrr sRNAs (Qrr1-Qrr4) are present that were shown to act  
308 redundantly to control bioluminescence, that is, any one of the Qrr sRNAs is sufficient  
309 to control HapR (LuxR homolog) (37). In their study, Lenz and colleagues showed that  
310 it was not until all four Qrrs were deleted in *V. cholerae*, that there is a difference in  
311 density-dependent bioluminescence (37). In *V. harveyi*, the five Qrrs were shown to act



312 additively to control LuxR expression. Using bioluminescence assays and quadruple *qrr*  
313 mutants, it was determined that each Qrr has a different level of strength in repressing  
314 *luxR* translation (29). In our study in *V. parahaemolyticus*, the data showed that  
315 expression of *qrr4* was restricted to low cell density cells and *qrr4* expression had an  
316 absolute requirement for LuxO and RpoN. We demonstrated that Qrr2 sRNA is the  
317 only Qrr that can act autonomously to control QS gene expression, but is not essential,  
318 since a  $\Delta qrr2$  mutant behaves like wild type (**Fig. S9**). Given that *qrr2* can be transcribed  
319 independent of RpoN, we propose that Qrr2 may have unique functions and/or targets  
320 in this species. We propose that *V. parahaemolyticus* can activate the transcription of *qrr2*  
321 via RpoN or RpoD to timely alter gene expression likely under different growth  
322 conditions.

### 323 **Materials and Methods:**

324 **Bacterial strains and media.** In this study, the wild type (WT) strain is a streptomycin-  
325 resistant clinical isolate of *Vibrio parahaemolyticus* RIMD2210633 and all strains used are  
326 described in **Table 1**. All *V. parahaemolyticus* strains were grown in lysogeny broth (LB;  
327 Fisher Scientific, Fair Lawn, NJ) supplemented with 3% NaCl (LBS) (weight/volume). *E.*  
328 *coli* strains were grown in LB 1% NaCl. A diaminopimelic acid (DAP) auxotroph of *E.*  
329 *coli*  $\beta 2155 \lambda pir$  was grown with 0.3 mM DAP in LB 1% NaCl. All strains were grown  
330 aerobically at 37°C. Antibiotics were used in the following concentrations:

331 chloramphenicol (Cm), 12.5 µg/mL, streptomycin (Str), 200 µg/mL; and tetracycline  
332 (Tet), 1 µg/mL.

333 **Construction of *V. parahaemolyticus* mutants.** We created the double deletion  
334 mutants  $\Delta rpoN/\Delta luxO$  and  $\Delta rpoN/\Delta fis$  using mutant vectors pDS $\Delta luxO$  and pDS $\Delta fis$ ,  
335 conjugated into the *V. parahaemolyticus*  $\Delta rpoN$  mutant background. The  $\Delta qrr$ -null mutant  
336 was constructed by creating truncated, non-functional copies of each *qrr* using SOE  
337 primer design, with primers listed in **Table 2**. All truncated *qrr* products were cloned  
338 into pDS132 suicide vector, transformed into the *E. coli*  $\beta 2155 \lambda pir$ , followed by  
339 conjugation and homologous recombination into the *V. parahaemolyticus* genome.  
340 Positive single-cross over colonies were selected using Cm. To induce a double  
341 crossover event, a positive single-cross strain was grown overnight in the absence of  
342 Cm, leaving behind either the truncated *qrr* allele or the wild-type allele in the genome.  
343 The overnight culture was plated on sucrose plates for selection of normal versus soupy  
344 colony morphology, as the colonies still harboring the pDS132 $\Delta qrr$  vector appear  
345 irregular due to the *sacB* gene. Colonies were screened via PCR for the truncated allele  
346 and sequenced to confirm deletion. The *qrr* null mutant was constructed by deleting *qrr*  
347 genes in the following order: *qrr3*, *qrr2*, *qrr1*, *qrr4*, *qrr5*. The quadruple  
348  $\Delta qrr3/\Delta qrr2/\Delta qrr4/\Delta qrr5$  mutant was constructed by re-introducing *qrr1* into the  $\Delta qrr$ -  
349 null mutant, and similarly *qrr2* and *qrr3* were each separately cloned into the  $\Delta qrr$ -null  
350 mutant to create their corresponding quad mutants. The  $\Delta qrr3/\Delta qrr2/\Delta qrr1/\Delta qrr5$  mutant

351 was constructed by deleting *qrr5* in the  $\Delta qrr3/\Delta qrr2/\Delta qrr1$  mutant background and  
352  $\Delta qrr3/\Delta qrr2/\Delta qrr1/\Delta qrr4$  was constructed by knocking out *qrr4* in the  $\Delta qrr3/\Delta qrr2/\Delta qrr1$   
353 background. The  $\Delta qrr2$  single mutant was constructed using the pDS $\Delta qrr2$  construct  
354 conjugated into the wild type background. The  $\Delta rpoN/\Delta qrr2$  mutant was constructed by  
355 conjugating the pDS $\Delta qrr2$  vector into the  $\Delta rpoN$  background. All mutants were  
356 sequenced to confirm deletions or insertions, ensuring in-frame mutant strains.

357 **RNA isolation and real-time PCR.** *Vibrio parahaemolyticus* wild type and mutants were  
358 grown overnight in LBS. Cells were washed twice with 1x phosphate-buffered saline  
359 (PBS) and diluted 1:50 into a fresh 5 mL culture of LBS. Cells were harvested at 0.1 OD  
360 and 0.5 OD and pelleted at 4°C. RNA was isolated from 4 mL of culture using the  
361 miRNAeasy Mini Kit (Qiagen, Hilden, Germany) and Qiazol lysis reagent. The  
362 concentration and purity of RNA was determined using a NanoDrop  
363 spectrophotometer (Thermo Scientific, Waltham, MA). RNA was treated with Turbo  
364 DNase (Invitrogen) and cDNA was synthesized using Superscript IV reverse  
365 transcriptase (Invitrogen) from 500 ng of RNA by priming with random hexamers.  
366 cDNA was diluted 1:10 for quantitative real-time PCR (qPCR) run on an Applied  
367 Biosystems QuantStudio™ 6 fast real-time PCR system (Applied Biosystems, Foster  
368 City, CA) using PowerUp SYBR green master mix (Life Technologies). qPCR primers  
369 used to amplify *opaR*, *aphA*, *qrr1*, *qrr2*, *qrr3*, *qrr4*, *qrr5*, and 16S rRNA are listed in **Table**  
370 **2** for reference. Cycle thresholds ( $C_T$ ) values were used to determine expression levels

371 normalized to 16S rRNA levels. Expression was calculated relative to wild-type 16S  
372 rRNA using the  $\Delta\Delta C_T$  method (60).

373 **Transcriptional GFP-reporter assay.** The *Pqrr2* reporter construct was created using the  
374 pRU1064 vector, which contains a promoter-less *gfp* cassette, as well as Tet and Amp  
375 resistance genes (61). Primers, listed in **Table 2**, were designed using NEBuilder online  
376 software to amplify the 337-bp regulatory region of *qrr2* from *V. parahaemolyticus*  
377 RIMD2210633 genomic DNA. The pRU1064 vector was purified, digested with Spe1,  
378 and ligated with the *Pqrr2* fragment via Gibson assembly protocol (62). The plasmid  
379 was then transformed into  $\beta 2155 \lambda pir$  and subsequently conjugated into wild-type and  
380  $\Delta luxO$ ,  $\Delta rpoN$ , and  $\Delta rpoN/\Delta fis$  mutants. Cultures were grown overnight in LBS with  
381 1 $\mu$ g/mL Tet, washed twice with 1xPBS and then diluted 1:1000 into fresh LBS + Tet and  
382 grown for 20 hours at 37°C. Cultures were washed twice with 1xPBS and loaded into a  
383 black, clear-bottom 96-well plate. Final OD and GFP relative fluoresces were  
384 determined using a Tecan Spark microplate reader with Magellan software with  
385 excitation at 385 nm and emission at 509 nm (Tecan Systems, Inc., San Jose, CA). Specific  
386 fluorescence was calculated by dividing the relative fluorescence by the final OD. This  
387 experiment was performed in three biological replicates.

388 Splicing by overlap extension (SOE) primer design was used to construct a  
389 mutated (ATA-10CCC) RpoD promoter. We used the same SOE $qrr2A$  and SOE $qrr2D$   
390 primers used to construct the  $\Delta qrr2$  mutant in order to create a mutated *qrr2* regulatory

391 region. In addition, SOE primers *Pqrr2SDMB* and *Pqrr2SDMC* (**Table 2**) have  
392 complementary overlapping sequences that amplify a mutated promoter, indicated in  
393 bold. Fragments AB and CD were then used as a template to amplify the AD fragment,  
394 containing a mutated RpoD -10 promoter. The AD fragment was then used as the  
395 template to create a fragment containing only the *qrr2* regulatory region (337-bp) using  
396 Gibson assembly primers *Pqrr2SDM\_GA*fwd and *Pqrr2SDM\_GA*rev. This mutated  
397 regulatory region was then ligated with SpeI digested pRU1064 using Gibson assembly  
398 and confirm via sequencing.

399 **Capsule polysaccharide (CPS) formation assay.** Capsule polysaccharide (CPS)  
400 formation assays were conducted as previously described (14, 45). In brief, single  
401 colonies of wild type and QS mutants were grown on heart infusion (HI) (Remel,  
402 Lenexa, KS) plates containing 1.5% agar, 2.5 mM CaCl<sub>2</sub>, and 0.25% Congo red dye for 48  
403 h at 30°C. Each image is an example from at least three biological replicates. The  
404 pBAD33 expression vector was used to overexpress *opaR* in wild type and  $\Delta$ *rpoN*  
405 backgrounds. The *opaR* coding region, plus 30-bp upstream to include the ribosomal  
406 binding site, were amplified from *V. parahaemolyticus* RIMD2210633 genome via  
407 Phusion High-Fidelity (HF) polymerase PCR (New England Biolabs). The amplified  
408 670-bp *opaR* coding region and pBAD33 empty vector (pBADEV) were digested with  
409 XbaI and HindIII restriction enzymes prior to ligation and transformation into *E. coli*  
410  $\beta$ 2155. pBAD $\textit{opaR}$  and pBADEV were conjugated into wild type,  $\Delta$ *rpoN*, and  $\Delta$ *opaR*, and

411 plated on Congo red plates to observe CPS formation. For strains containing pBAD,  
412 0.1% (wt/vol) arabinose and 5 µg/mL of Cm were added to the media after autoclaving,  
413 to induce and maintain the plasmid, respectively.

414 **Biofilm assay.** *Vibrio parahaemolyticus* cultures were grown overnight in LBS at 37°C  
415 with shaking. The overnight cultures were then used to inoculate a 96-well plate in a  
416 1:50 dilution with LBS. After static incubation at 37°C for 24 h, the culture liquid was  
417 removed and the wells were washed with 1xPBS. Crystal violet (Electron Microscopy  
418 Sciences), at 0.1% w/v, was added to the wells and incubated for 30 min at room  
419 temperature. The crystal violet was removed, and wells were washed twice with 1xPBS.  
420 The adhered crystal violet was solubilized in DMSO for an optical density reading at  
421 595nm (OD<sub>595</sub>).

422 **Motility assays.** Swimming and swarming assays were performed as previously  
423 described (14, 50). To assess swimming, a pipette tip was used to pick a single colony  
424 and stab into the center of an LB plate containing 2% NaCl and 0.3% agar. Plates were  
425 incubated for 24 h at 37°C. Three biological replicates were performed, and the diameter  
426 of growth was measured for quantification. Swarming assays were conducted on HI  
427 plates containing 2% NaCl and 1.5% agar and incubated at 30°C for 48 h before  
428 imaging.

429 **DNA-affinity pull-down.** A DNA-affinity pull-down was performed using previously  
430 described methods, with modifications as needed (63-65). Bait DNA primers were

431 designed to amplify the regulatory region of *qrr2* (346-bp) with a biotin moiety added to  
432 the 5' end. In addition, a negative control bait DNA (VPA1624 coding region, 342-bp)  
433 was amplified. Both bait DNA probes were amplified using Phusion HF polymerase  
434 (New England Biolabs) PCR and purified using ethanol extraction techniques (66). A 5  
435 mL overnight culture of  $\Delta rpoN$  grown in LB 3% NaCl was used to inoculate a fresh 100  
436 mL culture of LB 3% NaCl grown at 37°C with aeration. The culture was pelleted at 0.5  
437 OD at 4°C for 30 min and stored overnight at 80°C. The cell pellet was suspended in 1.5  
438 mL of Fastbreak lysis buffer (Promega, Madison, WI) and sonicated to shear genomic  
439 DNA. The  $\Delta rpoN$  lysate was pre-cleared with streptavidin DynaBeads (Thermo  
440 Scientific, Waltham, MA) to remove non-specific protein-bead interactions. Beads were  
441 incubated with 200  $\mu$ L of probe DNA for 20 min, twice. The  $\Delta rpoN$  lysate and sheared  
442 salmon sperm DNA (10 $\mu$ g/mL), as competitive DNA, were incubated with the beads  
443 twice, and washed. Protein candidates were eluted from the bait DNA-bead complex  
444 using elution buffers containing increasing concentrations of NaCl (100mM, 200mM,  
445 300mM, 500mM, 750mM and 1M). 6X SDS was added to samples along with 1mM  $\beta$ -  
446 mercaptoethanol (BME) and then boiled at 95°C for 5 min. A total of 25  $\mu$ L of each  
447 elution was run on 2 stain-free, 12% gels and visualized using the Pierce™ Silver Stain  
448 for Mass Spectrometry kit (Thermo Scientific, Waltham, MA). *Pqrr2* bait and negative  
449 control bait were loaded next to each other in order of increasing NaCl concentrations.  
450 Bands present in the *Pqrr2* bait lanes, but not in the negative control lanes were selected

451 and cut from the gel. Each fragment was digested separately with trypsin using  
452 standard procedures and prepared for Mass Spectrophotometry 18C ZipTips (Fisher  
453 Scientific, Fair Lawn, NJ). Candidates were eluted in 10  $\mu$ L twice, pooled, and dried  
454 again using SpeedVac. Dried samples were analyzed using the Thermo Q-Exactive  
455 Orbitrap and analyzed using Proteome Discoverer 1.4.

456 **Fis protein purification.** Fis was purified using the method previously described (48).  
457 Briefly, primer pair FisFWDpMAL and FisREVpMAL was used to amplify *fis* (VP2885)  
458 from *V. parahaemolyticus* RIMD2210633. The *fis* gene was cloned into the pMAL-c5x  
459 expression vector fused to a 6X His tag maltose binding protein (MBP) separated by a  
460 tobacco etch virus (TEV) protease cleavage site. Expression of pMAL<sub>*fis*</sub> in *E. coli* BL21  
461 (DE3) was induced with 0.5 mM IPTG once the culture reached 0.4 OD<sub>595</sub> and grown  
462 overnight at room temperature. Cells were harvested, suspended in lysis buffer (50 mM  
463 NaPO<sub>4</sub>, 200 mM NaCl, and 20 mM imidazole buffer [pH 7.4]), and lysed using a  
464 microfluidizer. The lysed culture was run over an IMAC column using HisPur Ni-NTA  
465 resin, followed by additional washing steps. Mass spectrometry was performed to  
466 confirm Fis protein molecular weight and SDS-PAGE was conducted to determine its  
467 purity along with A260/280 ratio analysis using a Nano drop.

468 **Electrophoretic mobility shift assay for Fis.** Purified Fis was used to conduct EMSAs  
469 using conditions previously described (48). Briefly, 30 ng of DNA probe was incubated  
470 with various concentrations of Fis (0 to 1.94  $\mu$ M) in binding buffer (10 mM Tris, 150 mM



471 KCL, 0.1 mM dithiothreitol, 0.1 mM EDTA, 5% PEG, pH7.4) for 20 min. The  
472 concentration of Fis was determined using Bradford reagent. A 6% native  
473 polyacrylamide gel was pre-run for 2 h at 4°C (200V) with 1x Tris-acetate-EDTA (TAE)  
474 buffer. The incubated DNA-protein samples were then loaded onto the gel (10 µL) and  
475 run for 2 h in the same conditions. The gel was stained in an ethidium bromide bath  
476 (0.5µg/mL) for 15 min before imaging. *Pqrr2* was further divided into a smaller probe to  
477 determine specificity of Fis binding to *Pqrr2*.

478

479

480

481

482

483

484 **References**

- 485 1. Fuqua WC, Winans SC, Greenberg EP. 1994. Quorum sensing in bacteria: the  
486 LuxR-LuxI family of cell density-responsive transcriptional regulators. *J Bacteriol*  
487 176:269-75.
- 488 2. Swift S, Downie J, Whitehead N, Barnard A, Salmond G, P W. 2001. Quorum  
489 sensing as a population-density-dependent determinant of bacterial physiology.  
490 *Adv Microb Physiol* 45:199-270.
- 491 3. Gray KM, Passador L, Iglewski BH, Greenberg EP. 1994. Interchangeability and  
492 specificity of components from the quorum-sensing regulatory systems of *Vibrio*  
493 *fischeri* and *Pseudomonas aeruginosa*. *J Bacteriol* 176:3076-80.
- 494 4. Neilson KH, Platt T, Hastings JW. 1970. Cellular Control of the Synthesis and  
495 Activity of the Bacterial Luminescent System1. *J Bacteriol* 104:313-22.
- 496 5. Miller MB, Skorupski K, Lenz DH, Taylor RK, Bassler BL. 2002. Parallel quorum  
497 sensing systems converge to regulate virulence in *Vibrio cholerae*. *Cell* 110:303-  
498 14.
- 499 6. Miller MB, Bassler BL. 2001. Quorum sensing in bacteria. *Annu Rev Microbiol*  
500 55:165-99.
- 501 7. Bassler BL, Greenberg EP, Stevens AM. 1997. Cross-species induction of  
502 luminescence in the quorum-sensing bacterium *Vibrio harveyi*. *J Bacteriol*  
503 179:4043-5.

- 504 8. Lilley BN, Bassler BL. 2000. Regulation of quorum sensing in *Vibrio harveyi* by  
505 LuxO and sigma-54. *Mol Microbiol* 36:940-54.
- 506 9. Eglund KA, Greenberg EP. 1999. Quorum sensing in *Vibrio fischeri*: elements of  
507 the luxI promoter. *Mol Microbiol* 31:1197-204.
- 508 10. Dunlap PV. 1999. Quorum regulation of luminescence in *Vibrio fischeri*. *J Mol*  
509 *Microbiol Biotechnol* 1:5-12.
- 510 11. Camara M, Hardman A, Williams P, Milton D. 2002. Quorum sensing in *Vibrio*  
511 *cholerae*, p 217-8, *Nat Genet*, vol 32, United States.
- 512 12. Zhu J, Miller MB, Vance RE, Dziejman M, Bassler BL, Mekalanos JJ. 2002.  
513 Quorum-sensing regulators control virulence gene expression in *Vibrio cholerae*.  
514 *Proc Natl Acad Sci U S A* 99:3129-34.
- 515 13. Bassler BL, Wright M, Showalter RE, Silverman MR. 1993. Intercellular signaling  
516 in *Vibrio harveyi*: sequence and function of genes regulating expression of  
517 luminescence. *Mol Microbiol* 4:773-86.
- 518 14. Kalburge SS, Carpenter MR, Rozovsky S, Boyd EF. 2017. Quorum Sensing  
519 Regulators Are Required for Metabolic Fitness in *Vibrio parahaemolyticus*. *Infect*  
520 *Immun* 85:930-16.
- 521 15. Kernell Burke A, Guthrie LTC, Modise T, Cormier G, Jensen RV, McCarter LL,  
522 Stevens AM. 2015. OpaR Controls a Network of Downstream Transcription  
523 Factors in *Vibrio parahaemolyticus* BB22OP, *PLoS One*, vol 10.

- 524 16. Zhang Y, Qiu Y, Tan Y, Guo Z, Yang R, Zhou D. 2012. Transcriptional regulation  
525 of opaR, qrr2-4 and aphA by the master quorum-sensing regulator OpaR in  
526 *Vibrio parahaemolyticus*. PLoS One 7:e34622.
- 527 17. Trimble MJ, McCarter LL. 2011. Bis-(3'-5')-cyclic dimeric GMP-linked quorum  
528 sensing controls swarming in *Vibrio parahaemolyticus*. Proc Natl Acad Sci U S A  
529 108:18079-84.
- 530 18. Sun F, Zhang Y, Wang L, Yan X, Tan Y, Guo Z, Qiu J, Yang R, Xia P, Zhou D.  
531 2012. Molecular Characterization of Direct Target Genes and cis-Acting  
532 Consensus Recognized by Quorum-Sensing Regulator AphA in *Vibrio*  
533 *parahaemolyticus*. PLoS One 7:e44210.
- 534 19. Zhang Y, Zhang L, Hou S, Huang X, Sun F, Gao H. 2016. The Master Quorum-  
535 Sensing Regulator OpaR is Activated Indirectly by H-NS in *Vibrio*  
536 *parahaemolyticus*. Current microbiology 73:71-6.
- 537 20. Enos-Berlage JL, Guvener ZT, Keenan CE, McCarter LL. 2005. Genetic  
538 determinants of biofilm development of opaque and translucent *Vibrio*  
539 *parahaemolyticus*. Mol Microbiol 55:1160-82.
- 540 21. Ishikawa T, Rompikuntal P, Lindmark B, Milton D, Wai S. 2009. Quorum sensing  
541 regulation of the two hcp alleles in *Vibrio cholerae* O1 strains. PloS One 4:e6734.
- 542 22. Weber B, Lindell K, El Qaidi S, Hjerde E, Willassen N, Milton D. 2011. The  
543 phosphotransferase VanU represses expression of four qrr genes antagonizing

- 544 VanO-mediated quorum-sensing regulation in *Vibrio anguillarum*. *Microbiology*  
545 157:3324-3339.
- 546 23. Weber B, Croxatto A, Chen C, Milton D. 2008. RpoS induces expression of the  
547 *Vibrio anguillarum* quorum-sensing regulator VanT. *Microbiology* 154:767-780.
- 548 24. Waters LS, Storz G. 2009. Regulatory RNAs in Bacteria. *Cell* 136:615-28.
- 549 25. Storz G, Vogel J, Wassarman KM. 2011. Regulation by small RNAs in bacteria:  
550 expanding frontiers. *Mol Cell* 43:880-91.
- 551 26. Updegrove T, Zhang A, Storz G. 2016. Hfq: the flexible RNA matchmaker. *Curr*  
552 *Opin Microbiol* 30:133-138.
- 553 27. Lenz DH, Bassler BL. 2007. The small nucleoid protein Fis is involved in *Vibrio*  
554 *cholerae* quorum sensing. *Mol Microbiol* 63:859-71.
- 555 28. Papenfort K, Bassler BL. 2016. Quorum sensing signal-response systems in  
556 Gram-negative bacteria. *Nat Rev Microbiol* 14:576-88.
- 557 29. Tu KC, Bassler BL. 2007. Multiple small RNAs act additively to integrate sensory  
558 information and control quorum sensing in *Vibrio harveyi*. *Genes Dev* 21:221-33.
- 559 30. Shao Y, Bassler BL. 2012. Quorum-sensing non-coding small RNAs use unique  
560 pairing regions to differentially control mRNA targets. *Mol Microbiol* 83:599-611.
- 561 31. Svenningsen S. 2018. Small RNA-Based Regulation of Bacterial Quorum Sensing  
562 and Biofilm Formation. *Microbiol Spectr* 6.

- 563 32. Lin W, Kovacicova G, Skorupski K. 2007. The quorum sensing regulator HapR  
564 downregulates the expression of the virulence gene transcription factor AphA in  
565 *Vibrio cholerae* by antagonizing Lrp- and VpsR-mediated activation. *Mol*  
566 *Microbiol* 64:953-67.
- 567 33. Pompeani AJ, Irgon JJ, Berger MF, Bulyk ML, Wingreen NS, Bassler BL. 2008.  
568 The *Vibrio harveyi* master quorum-sensing regulator, LuxR, a TetR-type protein  
569 is both an activator and a repressor: DNA recognition and binding specificity at  
570 target promoters. *Mol Microbiol* 70:76-88.
- 571 34. Rutherford ST, van Kessel JC, Shao Y, Bassler BL. 2011. AphA and LuxR/HapR  
572 reciprocally control quorum sensing in vibrios. *Genes Dev* 25:397-408.
- 573 35. Shao Y, Feng L, Rutherford S, Papenfort K, Bassler B. 2013. Functional  
574 determinants of the quorum-sensing non-coding RNAs and their roles in target  
575 regulation. *EMBO J* 32:2158-71.
- 576 36. Hunter GA, Keener JP. 2014. Mechanisms underlying the additive and  
577 redundant Qrr phenotypes in *Vibrio harveyi* and *Vibrio cholerae*. *J Theor Biol*  
578 340:38-49.
- 579 37. Lenz DH, Mok KC, Lilley BN, Kulkarni RV, Wingreen NS, Bassler BL. 2004. The  
580 small RNA chaperone Hfq and multiple small RNAs control quorum sensing in  
581 *Vibrio harveyi* and *Vibrio cholerae*. *Cell* 118:69-82.

- 582 38. Joseph S, Colwell R, Kaper J. 1982. *Vibrio parahaemolyticus* and related  
583 halophilic Vibrios. *Crit Rev Microbiol* 10:77-124.
- 584 39. Colwell R, Kaper J, Joseph S. 1977. *Vibrio cholerae*, *Vibrio parahaemolyticus*, and  
585 other vibrios: occurrence and distribution in Chesapeake Bay. *Science* (New  
586 York, NY) 198:394-6.
- 587 40. Thompson F, Iida T, Swings J. 2004. Biodiversity of vibrios. *Microbiology and*  
588 *molecular biology reviews* : MMBR 68:403-31.
- 589 41. Nair GB, Ramamurthy T, Bhattacharya SK, Dutta B, Takeda Y, Sack DA. 2007.  
590 Global dissemination of *Vibrio parahaemolyticus* serotype O3:K6 and its  
591 serovariants. *Clin Microbiol Rev* 20:39-48.
- 592 42. O'Boyle N, Boyd A. 2014. Manipulation of intestinal epithelial cell function by  
593 the cell contact-dependent type III secretion systems of *Vibrio parahaemolyticus*.  
594 *Front Cell Infect Microbiol* 3.
- 595 43. Allison C, Hughes C. 1991. Bacterial swarming: an example of prokaryotic  
596 differentiation and multicellular behaviour. *Sci Prog* 75:403-22.
- 597 44. McCarter LL. 1998. OpaR, a Homolog of *Vibrio harveyi* LuxR, Controls Opacity  
598 of *Vibrio parahaemolyticus*, p 3166-73, *J Bacteriol*, vol 180.
- 599 45. ZT G, LL M. 2003. Multiple regulators control capsular polysaccharide  
600 production in *Vibrio parahaemolyticus*. *J Bacteriol* 185:5431-41.

- 601 46. Gode-Potratz CJ, McCarter LL. 2011. Quorum sensing and silencing in *Vibrio*  
602 *parahaemolyticus*. *J Bacteriol* 193:4224-37.
- 603 47. Jaques S, McCarter L. 2006. Three new regulators of swarming in *Vibrio*  
604 *parahaemolyticus*. *J Bacteriol* 188:2625-35.
- 605 48. Gregory GJ, Morreale DP, Carpenter MR, Kalburge SS, Boyd EF. 2019. Quorum  
606 Sensing Regulators AphA and OpaR Control Expression of the Operon  
607 Responsible for Biosynthesis of the Compatible Solute Ectoine. *Appl Environ*  
608 *Microbiol* 85:1543-19.
- 609 49. Gregory GJ, Morreale DP, Boyd EF. 2020. CosR Is a Global Regulator of the  
610 Osmotic Stress Response with Widespread Distribution among Bacteria. *Appl*  
611 *Environ Microbiol* 86:120-20.
- 612 50. Whitaker WB, Richards GP, Boyd EF. 2014. Loss of sigma factor RpoN increases  
613 intestinal colonization of *Vibrio parahaemolyticus* in an adult mouse model.  
614 *Infect Immun* 82:544-56.
- 615 51. Eickhoff M, Fei C, Huang X, Bassler B. 2021. LuxT controls specific quorum-  
616 sensing-regulated behaviors in *Vibrionaceae* spp. via repression of *qrr1*,  
617 encoding a small regulatory RNA. *PLoS Genet* 17:e1009336.
- 618 52. Schaefer J, Engl C, Zhang N, Lawton E, Buck M. 2015. Genome wide interactions  
619 of wild-type and activator bypass forms of  $\sigma^{54}$ . *Nucleic Acids Res* 43:7280-91.



- 620 53. Zafar MA, Carabetta VJ, Mandel MJ, Silhavy TJ. 2014. Transcriptional occlusion  
621 caused by overlapping promoters. *Proc Natl Acad Sci U S A* 111:1557-61.
- 622 54. Reichenbach B, Göpel Y, Görke B. 2009. Dual control by perfectly overlapping  
623 sigma 54- and sigma 70- promoters adjusts small RNA GlmY expression to  
624 different environmental signals. *Mol Microbiol* 74:1054-70.
- 625 55. Keane OM, Dorman CJ. 2003. The *gyr* genes of *Salmonella enterica* serovar  
626 Typhimurium are repressed by the factor for inversion stimulation, Fis. *Mol*  
627 *Genet Genomics* 270:56-65.
- 628 56. Browning DF, Grainger DC, Beatty CM, Wolfe AJ, Cole JA, Busby SJ. 2005.  
629 Integration of three signals at the *Escherichia coli* *nrf* promoter: a role for Fis  
630 protein in catabolite repression. *Mol Microbiol* 57:496-510.
- 631 57. Kelly A, Goldberg MD, Carroll RK, Danino V, Hinton JCD, Dorman CJ. 2004. A  
632 global role for Fis in the transcriptional control of metabolism and type III  
633 secretion in *Salmonella enterica* serovar Typhimurium. *Microbiology* 150:2037-  
634 2053.
- 635 58. Grainger DC, Hurd D, Goldberg MD, Busby SJ. 2006. Association of nucleoid  
636 proteins with coding and non-coding segments of the *Escherichia coli* genome.  
637 *Nucleic Acids Res* 34:4642-52.

- 638 59. Wang Q, Liu Q, Ma Y, Rui H, Zhang Y. 2007. LuxO controls extracellular  
639 protease, haemolytic activities and siderophore production in fish pathogen  
640 *Vibrio alginolyticus*. *J Appl Microbiol* 103:1525-34.
- 641 60. Livak KJ, Schmittgen TD. 2001. Analysis of relative gene expression data using  
642 real-time quantitative PCR and the 2(-Delta Delta C(T)) Method. *Methods* 25:402-  
643 8.
- 644 61. Karunakaran R, Mauchline TH, Hosie AH, Poole PS. 2005. A family of promoter  
645 probe vectors incorporating autofluorescent and chromogenic reporter proteins  
646 for studying gene expression in Gram-negative bacteria. *Microbiology* 151:3249-  
647 56.
- 648 62. Gibson DG. 2011. Enzymatic assembly of overlapping DNA fragments. *Methods*  
649 *Enzymol* 498:349-61.
- 650 63. Chaparian RR, Tran MLN, Conrad LCM, Rusch DB, Kessel JCV. 2019. Global H-  
651 NS counter-silencing by LuxR activates quorum sensing gene expression.
- 652 64. Chaparian RR, Olney SG, Hustmyer CM, Rowe-Magnus DA, van Kessel JC. 2016.  
653 Integration host factor and LuxR synergistically bind DNA to coactivate quorum-  
654 sensing genes in *Vibrio harveyi*. *Mol Microbiol* 101:823-40.
- 655 65. Jutras BL, Verma A, Stevenson B. 2012. Identification of novel DNA-binding  
656 proteins using DNA-affinity chromatography/pull down. *Curr Protoc Microbiol*  
657 Chapter 1:Unit1F.1.

- 658 66. Jutras BL, Liu Z, Brissette CA. 2010. Simultaneous isolation of Ixodidae and  
659 bacterial (*Borrelia* spp.) genomic DNA. *Curr Protoc Microbiol C* 1:E.2.
- 660 67. Whitaker WB, Parent MA, Naughton LM, Richards GP, Blumerman SL, Boyd EF.  
661 2010. Modulation of Responses of *Vibrio parahaemolyticus* O3:K6 to pH and  
662 Temperature Stresses by Growth at Different Salt Concentrations. *Appl Environ*  
663 *Microbiol* 76:4720-9.
- 664 68. Makino K, Oshima K, Kurokawa K, Yokoyama K, Uda T, Tagomori K, Iijima Y,  
665 Najima M, Nakano M, Yamashita A, Kubota Y, Kimura S, Yasunaga T, Honda T,  
666 Shinagawa H, Hattori M, Iida T. 2003. Genome sequence of *Vibrio*  
667 *parahaemolyticus*: a pathogenic mechanism distinct from that of *V. cholerae*.  
668 *Lancet* 361:743-9.
- 669 69. Dehio C, Meyer M. 1997. Maintenance of broad-host-range incompatibility group  
670 P and group Q plasmids and transposition of Tn5 in *Bartonella henselae*  
671 following conjugal plasmid transfer from *Escherichia coli*. *J Bacteriol* 179:538-40.
- 672 70. Philippe N, Alcaraz JP, Coursange E, Geiselmann J, Schneider D. 2004.  
673 Improvement of pCVD442, a suicide plasmid for gene allele exchange in bacteria.  
674 *Plasmid* 51:246-55.
- 675 71. Guzman LM, Belin D, Carson MJ, Beckwith J. 1995. Tight regulation, modulation,  
676 and high-level expression by vectors containing the arabinose PBAD promoter. *J*  
677 *Bacteriol* 177:4121-30.

678

679 **Table 1.** Strains and plasmids used in this study

| Strain or plasmid                     | Genotype                                                           | Source                   |
|---------------------------------------|--------------------------------------------------------------------|--------------------------|
| <b><i>Vibrio parahaemolyticus</i></b> |                                                                    |                          |
| RIMD2210633                           | O3:K6 clinical isolate; StrR                                       | (67, 68)                 |
| SSK2099 ( $\Delta luxO$ )             | RIMD2210633 $\Delta luxO$ ; StrR                                   | (14)                     |
| SSK2516 ( $\Delta opaR$ )             | RIMD2210633 $\Delta opaR$ ; StrR                                   | (14)                     |
| WBW2670( $\Delta rpoN$ )              | RIMD2210633 $\Delta rpoN$ ; StrR                                   | (50)                     |
| JGT2019 ( $\Delta rpoN/\Delta luxO$ ) | RIMD2210633 $\Delta rpoN/\Delta luxO$ ; StrR                       | This study               |
| JGT2020 ( $\Delta rpoN/\Delta qrr2$ ) | RIMD2210633 $\Delta rpoN/\Delta qrr2$ ; StrR                       | This study               |
| JGT2021 ( $\Delta rpoN/\Delta fis$ )  | RIMD2210633 $\Delta rpoN/\Delta fis$ ; StrR                        | This study               |
| JGTqrr1345 ( $\Delta qrr2$ )          | RIMD2210633 $\Delta qrr2$ ; StrR                                   | This study               |
| GJGqrr-null                           | RIMD2210633 $\Delta qrr3,2,1,4,5$ ; StrR                           | This study               |
| JGTqrr1                               | RIMD2210633 $\Delta qrr3,2,4,5$ ; StrR                             | This study               |
| JGTqrr2                               | RIMD2210633 $\Delta qrr3,1,4,5$ ; StrR                             | This study               |
| JGTqrr3                               | RIMD2210633 $\Delta qrr2,1,4,5$ ; StrR                             | This study               |
| JGTqrr4                               | RIMD2210633 $\Delta qrr3,2,1,5$ ; StrR                             | This study               |
| JGTqrr5                               | RIMD2210633 $\Delta qrr3,2,1,4$ ; StrR                             | This study               |
| RIMD2210633 <i>popaR</i>              | RIMD2210633 harboring pBAD <i>opaR</i>                             | This study               |
| RIMD2210633 pEV                       | RIMD2210633 harboring pBAD33                                       | This study               |
| $\Delta opaR$ <i>popaR</i>            | $\Delta opaR$ harboring pBAD <i>opaR</i>                           | This study               |
| $\Delta opaR$ pEV                     | $\Delta opaR$ harboring pBAD33                                     | This study               |
| $\Delta rpoN$ <i>popaR</i>            | $\Delta rpoN$ harboring pBAD <i>opaR</i>                           | This study               |
| $\Delta rpoN$ pEV                     | $\Delta rpoN$ harboring pBAD33                                     | This study               |
| $\Delta rpoN$ <i>pqrr2-10CCC</i>      | $\Delta rpoN$ harboring pRUP <i>qrr2</i> with mutated -10 promoter | This study               |
| <b><i>Escherichia coli</i></b>        |                                                                    |                          |
| Dh5 $\alpha$                          | $\Delta lac$ <i>pir</i>                                            | Thermo Fisher Scientific |
| B2155 $\lambda$ <i>pir</i>            | $\Delta dapA::erm$ <i>pir</i> ; for conjugations                   | (69)                     |
| <b>Plasmids</b>                       |                                                                    |                          |
| pDS132                                | Suicide vector; CmR; <i>sacB</i> (sucrose intolerant)              | (70)                     |
| pBAD33                                | Expression vector; <i>araB</i> promoter; Cm <sup>r</sup>           | (71)                     |

|                    |                                                          |            |
|--------------------|----------------------------------------------------------|------------|
| pBAD $opaR$        | pBAD33 with $opaR$ , CmR                                 | This study |
| pRU1064            | promoterless-gfpUV, AmpR, TetR, IncP origin              | (61)       |
| pRUP $qrr2$        | pRU1064 with P $qrr2$ -gfp, AmpR, TetR                   | This study |
| pRUP $qrr2$ -10CCC | pRUP $qrr2$ with mutated -10 to CCC promoter, AmpR, TetR | This study |
| pRUP $opaR$        | pRU1064 with P $opaR$ -gfp, AmpR, TetR                   | This study |

680

681

682 **Table 2.** Primers used in this study

| Primer        | Sequence (5'-3')                                    | Length (bp) |
|---------------|-----------------------------------------------------|-------------|
| <b>Mutant</b> |                                                     |             |
| SOEqrr1A      | catgcatatcgagctGAATTGCGTTGTTGACCG                   | 554         |
| SOEqrr1B      | aaagctgatGGTTCGCTAATATATCAGCATG                     |             |
| SOEqrr1C      | agcgaccatccATCAGCTTTTCGTGTTAACTAG                   | 543         |
| SOEqrr1D      | attcccgggagagctGATATGCCGGAAGTCTCG                   |             |
| SOEqrr1FLFwd  | TTCATCGAGGAACAACGTGC                                | 1873        |
| SOEqrr1FLRev  | GCCGGGCAATTATGAGCTAG                                |             |
| SOEqrr2A      | TCTAGAAGAGACGGGTTAATACGACGA                         | 456         |
| SOEqrr2B      | TCAAAGCTTTATTTTGGGCA                                |             |
| SOEqrr2C      | TGAACAACGTTACTTACGTGCTTTGC                          | 461         |
| SOEqrr2D      | GAGCTCACCGCGCTCAACAATAATG                           |             |
| SOEqrr2FLFwd  | TTGATGGCGCTACGATTGGT                                | 1237        |
| SOEqrr2FLRev  | CGCTAAGGTTGCAATGCTCG                                |             |
| SOEqrr3A      | CACTCTAGAATTGCTCAAGTGGTGGCTTT                       | 560         |
| SOEqrr3B      | TTTATATGCCCGAAAATCGTG                               |             |
| SOEqrr3C      | cacgattttcgggcatataaaCGGCTACTGCTCTCCTTTAT           | 607         |
| SOEqrr3D      | cacgagctcGTGTTGGGAAGTGGTCCAAG                       |             |
| SOEqrr3FLFwd  | GCAAAAATGACACTGCCAGAA                               | 1887        |
| SOEqrr3FLRev  | GTTGCTTTATGCACCGGAAT                                |             |
| SOEqrr4A      | catgcatatcgagctGCGCAAGGTTGTCTAG                     | 477         |
| SOEqrr4B      | gtctctagaaGATGCGTGCCAACTTTAAAAAAG                   |             |
| SOEqrr4C      | ggcacgcatcttCTAGAGACCGATAATATTCACATT                | 517         |
| SOEqrr4D      | attcccgggagagctATTACCTTGGGGCAACATGC                 |             |
| SOEqrr4FLFwd  | CGGCTTTGAGTCTGTGCAAT                                | 1796        |
| SOEqrr4FLRev  | GCGACTACCCTACCCGTTTA                                |             |
| SOEqrr5A      | catgcatatcgagctTTCAAGTTATGAATAGCGATG                | 523         |
| SOEqrr5B      | cctgaagatGCTGTAGGAAGTTATTAG                         |             |
| SOEqrr5C      | tacagcgcATCTTCAGGTTTCCTATCTCTA                      | 525         |
| SOEqrr5D      | attcccgggagagctTTTCTTGGCTTCAACACG                   |             |
| SOEqrr5FLFwd  | TCTTTGGGGAGCTGTTCGAT                                | 1853        |
| SOEqrr5FLRev  | GGCGTTTACTGGTCTGCATC                                |             |
| Pqrr2SDM10B   | cttaagaagggctcgagaagGGGtatgcattaatcatgccaatttca     |             |
| Pqrr2SDM10C   | catgattaatgcatacCCcttctcgacccttctaagccgagggtcacctag |             |

|                      |                                            |     |
|----------------------|--------------------------------------------|-----|
| <b>Expression</b>    |                                            |     |
| pBADopaR_fwd         | TACTCTAGAACAACAACACTCAAATGGCAAGGAAA        | 670 |
| pBADopaR_rev         | CTAAAGCTTTGAGCTTTAGTGTTTCGCGATTG           |     |
| <b>qPCR</b>          |                                            |     |
| opaR_fwd             | CCATGTTGTCCGTCAGTTCTCG                     | 158 |
| opaR_rev             | GAGTTGATGCGCTCCACTCG                       |     |
| aphA_fwd             | AGCCACCAACAAGTTTACCG                       | 140 |
| aphA_rev             | CATTCTCCAAGAGCGCTACG                       |     |
| qrr1_fwd             | CTCGGGTCACCTAGCCAACACT                     | 85  |
| qrr1_rev             | AAGAAGCCAATAGGCAGTCG                       |     |
| qrr2_fwd             | CTTAAGCCGAGGGTACCTA                        | 95  |
| qrr2_rev             | ATAGCCAACCGCAATAATCG                       |     |
| qrr3_fwd             | CTTAAGCCGAGGGTACCTA                        | 95  |
| qrr3_rev             | ATAGCCAACCGCAAAGAGTG                       |     |
| qrr4_fwd             | ACCCTTATTAAGCCGAGGGTCA                     | 101 |
| qrr4_rev             | AACGCCAATCACAAGAAAGG                       |     |
| qrr5_fwd             | TCTAAGCCGAGGGTACCTA                        | 95  |
| qrr5_rev             | AAAAGCCAACCACAAGGTGT                       |     |
| 16S_fwd              | ACCGCCTGGGGAGTACGGTC                       | 234 |
| 16S_rev              | TTGCGCTCGTTGCGGGACTT                       |     |
| <b>GFP reporter</b>  |                                            |     |
| pRUPopaR_fwd         | tagatagagagagagagagaACTGTGCTCAATTTAGTTTG   | 358 |
| pRUPopaR_rev         | actcatttttcttctccaATCCATTTTCCTTGCCATTG     |     |
| pRUPqrr2_fwd         | actcatttttcttctccaAGAAGTATTATGCATTAATCATGC | 377 |
| pRUPqrr2_rev         | tagatagagagagagagagaTTCTTTAGTGCTAAGTCATG   |     |
| <b>EMSA</b>          |                                            |     |
| Pqrr2_fwd            | GAAGGGTCGAGAAGTATTATGC                     | 290 |
| Pqrr2_rev            | AAGTATGAAATAGTGTCGTAGTTAATATT              |     |
| Pqrr2_1A_fwd         | GAAGGGTCGAGAAGTATTATG                      | 120 |
| Pqrr2_1A_rev         | AATTAAGTTTTGTTTTTTGCAAAAATTTAT             |     |
| Pqrr2_1B_fwd         | GATATTGCCTATATAAATTTTTGCAAAA               | 119 |
| Pqrr2_1B_rev         | ATTTTATTTTCATTTACATTTTACTAAC               |     |
| Pqrr2_1C_fwd         | GTAAATGAAAATAAAATGTTAACGAGTTG              | 110 |
| Pqrr2_1C_rev         | AAGTATGAAATAGTGTCGTAGTTAATATT              |     |
| <b>Mutagenesis</b>   |                                            |     |
| Pqrr2SDM10_GA<br>fwd | tagatagagagagagagagaTTCTTTAGTGCTAAGTCATG   | 377 |
| Pqrr2SDM10_GA        | actcatttttcttctccaAGAAGGGGTATGCATTAATC     |     |

|              |                                                                  |     |
|--------------|------------------------------------------------------------------|-----|
| rev          |                                                                  |     |
| SOEqrr2A     | <i>TCTAGAAGAGACGGGTTAATACGACGA</i>                               | 500 |
| SOEqrr2SDM_B | <i>CATGATTAATGCATACCCCTTCTCGACCCTTCTTA<br/>AGCCGAGGGTCACCTAG</i> |     |
| SOEqrr2SDM_C | <i>CTTAAGAAGGGTCGAGAAGGGGTATGCATTAATC<br/>ATGCCAATTTTCA</i>      | 605 |
| SOEqrr2D     | <i>GAGCTCACCGCGCTCAACAATAATG</i>                                 |     |

683

684



685 **Figure legends**

686

687 **Figure 1:** *Vibrio parahaemolyticus* quorum sensing pathway. Autoinducers (AIs) are  
688 synthesized internally by three synthases and then excreted outside the cell. At low cell  
689 density, three histidine-kinase receptors are free of AIs, therefore act as kinases,  
690 phosphorylating LuxU and ultimately LuxO. LuxO-P activates RpoN and, along with  
691 Fis positively regulates transcription of five small quorum regulatory RNAs (Qrr  
692 sRNAs). The Qrr sRNAs, along with Hfq, stabilize *aphA* transcripts and destabilize *opaR*  
693 transcripts. In addition, AphA is a negative regulator of *opaR* expression. At high cell  
694 density, LuxO is unphosphorylated and inactivate, no *qrrs* are transcribed, *opaR* is  
695 expressed and *aphA* is repressed. OpaR positively regulates capsule polysaccharide  
696 production (CPS), biofilm formation, type 6 secretion system-1, and the type IV pilin  
697 MSHA, among other genes. OpaR negatively regulates swarming motility, surface  
698 sensing and two contact dependent secretion systems T3SS-1 and T6SS-1.

699 **Figure 2: A.** Wild type (WT) and QS mutant strains production of capsule  
700 polysaccharide (CPS) and colony morphology on Congo red plates. **B.** Biofilm assay  
701 from cultures grown for 24 h, stagnant and stained with crystal violet. Images are  
702 representatives from three bio-reps. Biofilm quantification of three bio-reps in duplicate.  
703 Statistics calculated using a Student's t-test. \*\*\*, P-value <0.001

704 **Figure 3:** Quantitative real time PCR expression analysis of cells grown to 0.1 (**A, C**) or  
705 0.5 OD (**B, D**) in LB media supplemented with 3% NaCl. Expression of *opaR* and *aphA*  
706 relative to WT RIMD2210633 and normalized to 16S housekeeping gene. Means and  
707 standard error of at least two biological replicates shown. Statistics calculated using a  
708 Student's t-test. \*, P-value <0.05; \*\*, P-value <0.01.

709 **Figure 4:** Quantitative real time PCR expression analysis of cells grown to 0.1 (**A, C**) or  
710 0.5 OD (**B, D**) in LB media supplemented with 3% NaCl. Expression of *qrr1-5* relative to  
711 wild type RIMD2210633 and normalized to 16S housekeeping gene. Expression of *qrr4*  
712 not detected in mutant strains. Means and standard error of at least two biological  
713 replicates shown. Statistics calculated using a Student's t-test. \*, P-value <0.05; \*\*, P-  
714 value <0.01; \*\*\*, P-value <0.001.

715 **Figure 5:** **A.** *Pqrr2*-gfp reporter assay of *qrr2* in *luxO* and *rpoN* mutants. **B.** *PopaR*-gfp  
716 reporter assays in a single *qrr2* deletion mutant and a quadruple mutant with only *qrr2*  
717 present. Cultures grown for 20 h in LB 3% NaCl. Means and standard error of at least  
718 three biological replicates shown. Statistics calculated using a one-way ANOVA and  
719 Tukey-Kramer *post-hoc* test. \*\*, P-value <0.01

720 **Figure 6:** **A.** Analysis of *qrr2* regulatory region indicates overlapping sigma-54 and  
721 sigma-70 promoters. **B.** *Pqrr2* GFP reporter assay of *qrr2* in  $\Delta rpoN$  relative to wild type  
722 and mutated putative -10 RpoD binding site are indicated by asterisks. Means and

723 standard error of three biological replicates shown. Statistics calculated using a one-way  
724 ANOVA and Tukey-Kramer *post-hoc* test. \*\*\*, P-value <0.001

725 **Figure 7: A.** Regulatory region of *qrr2* depicted. Lines represent EMSA probes and blue  
726 triangles represent putative Fis binding sites using Virtual Footprint prediction  
727 software. Numbers indicate Fis binding site distance from *qrr2* transcriptional start site.

728 **B.** Electrophoretic mobility shift assays of P*qrr2* with purified Fis protein using four *qrr2*  
729 regulatory region DNA probes **C.** pRUP*qrr2* reporter assays in  $\Delta rpoN$  and  $\Delta rpoN/\Delta fis$

730 deletion mutants mutants relative to WT. Cultures grown for 20 h in LB 3% NaCl.

731 Means and standard error of at least three biological replicates shown. Statistics  
732 calculated using a one-way ANOVA and Tukey-Kramer *post-hoc* test. \*\*\*, P-value  
733 <0.001.

734 **Figure 8:** Model for *qrr2* transcription in the  $\Delta luxO$  and  $\Delta rpoN$  mutants. In the  $\Delta luxO$   
735 mutant, under certain conditions RpoN will be bound to the *qrr2* RpoN -24 -12  
736 promoter region. RpoN bound at the promoter will be aided by Fis. This will prevent  
737 sigma-70 from binding. In the absence of RpoN (sigma-54), RpoD (sigma-70) can bind to  
738 the -35 -10 promoter region to initiate transcription. In the absence of Fis in the rpoN  
739 mutant transcription by RpoD is increased further as in the  $\Delta rpoN/\Delta fis$  mutant.

740

741 **Supplementary Figure Legends**

742 **Figure S1:** Complementation analysis of  $\Delta rpoN$  mutant with *opaR*. Expression vectors  
743 pBAD*opaR* and pBAD33 (empty vector) were conjugated into the *V. parahaemolyticus*  
744 *rpoN* mutant and spot inoculated on to congo red plates supplemented with 0.1%  
745 arabinose and 5  $\mu$ g/ml chloramphenicol.

746 **Figure S2:** Gene expression analysis of cells grown to 0.1 OD and 0.5 OD in LB 3%  
747 NaCl. Expression of *qrr1* to *qrr5* at 0.1 OD relative to 0.5 OD, and normalized to 16S  
748 housekeeping gene. Means and standard error of at least two biological replicates  
749 shown. Expression of *qrr4* not detected at 0.5 OD. Statistics calculated using a Student's  
750 t-test. \*, P-value <0.05; \*\*, P-value <0.01.

751 **Figure S3: A.** Quantitative real time PCR (qPCR) analysis of *opaR* and **B.** *aphA*. A. qPCR  
752 analysis in single *DrpoN* mutant and double *DrpoN/Dqrr2* mutant. Two bio-reps in  
753 duplicate performed. Means and standard error of at least two biological replicates  
754 shown. Statistics calculated using a Student's t-test. \*\*, P-value <0.01

755 **Figure S4:** Phenotypic analysis of  $\Delta rpoN/\Delta qrr2$  double deletion mutant  
756 **A.** CPS production in double mutant. **B.** Biofilm assay and quantification from cultures  
757 grown for 24 h stagnant and stained with crystal violet. Three bio-reps in duplicate  
758 performed. Statistics calculated using a one-way ANOVA and Tukey-Kramer *post-hoc*  
759 test. \*\*\*, P-value <0.001

760 **Figure S5.** The *V. parahaemolyticus* Qrr sRNAs regulatory and coding regions were  
761 aligned using T-COFFEE Multiple Sequence Aligner. The RpoN conserved binding site

762 at -24 -12 and the transcriptional start site are labeled. The red lines indicate the RpoN  
763 promoter region with a highly conserved TGGC(-24) and TGC(-12). An asterisk  
764 indicates conserved nucleotides among all five *qrrs*. The blue box depicts the putative  
765 RpoD promoter of *qrr2*.

766 **Figure S6.** The *qrr2* gene sequence alignment from *V. harveyi* ATCC 33843, *V. campbellii*  
767 ATCC BAA-1116, *V. parahaemolyticus* RIMD2210633 and *V. alginolyticus*  
768 FDAARGOS\_114 and the regulatory regions aligned using CLUSTALW. The sigma-54  
769 conserved -24 -12 promoter binding sites are shown in blue boxes and the sigma-70 -35  
770 and -10 promoter are shown in red boxes. The conserved nucleotides among the *qrr2*  
771 genes are shown by an asterisk. The data shows that the -10 promoter site is conserved  
772 between *V. parahaemolyticus* and *V. alginolyticus* with a 1-bp polymorphism in *V. harveyi*.  
773 Similarly, the -35 site is highly conserved between *V. parahaemolyticus* and *V.*  
774 *alginolyticus* but contains several polymorphisms in *V. harveyi*.

775 **Figure S7.** Phylogenetic tree of the *qrr* genes in *V. harveyi* ATCC 33843, *V. campbellii*  
776 ATCC BAA-1116, *V. parahaemolyticus* RIMD2210633 and *V. alginolyticus*  
777 FDAARGOS\_114. The evolutionary history was inferred by using the Maximum  
778 Likelihood method and Jukes-Cantor model in MEGA X (1,2). The tree with the highest  
779 log likelihood (-467.92) is shown. The percentage of trees in which the associated taxa  
780 clustered together is shown next to the branches. Initial tree(s) for the heuristic search  
781 were obtained automatically by applying Neighbor-Join and BioNJ algorithms to a

782 matrix of pairwise distances estimated using the Maximum Composite Likelihood  
783 (MCL) approach, and then selecting the topology with superior log likelihood value. A  
784 discrete Gamma distribution was used to model evolutionary rate differences among  
785 sites (3 categories (+G, parameter = 0.2492)). The tree is drawn to scale, with branch  
786 lengths measured in the number of substitutions per site. This analysis involved 20  
787 nucleotide sequences.

788 1. Jukes T.H. and Cantor C.R. (1969). Evolution of protein molecules. In Munro HN,  
789 editor, *Mammalian Protein Metabolism*, pp. 21-132, Academic Press, New York.

790 2. Kumar S., Stecher G., Li M., Knyaz C., and Tamura K. (2018). MEGA X: Molecular  
791 Evolutionary Genetics Analysis across computing platforms. *Molecular Biology and*  
792 *Evolution* **35**:1547-1549.

793 3. Felsenstein J. (1985). Confidence limits on phylogenies: An approach using the  
794 bootstrap. *Evolution* **39**:783-791.

795 **Figure S8:** Phenotypes of *qrr* deletion mutants. **A.** Swarming assay conducted on heart-  
796 infusion media incubated at 30°C for 48 h. **B.** Swimming motility assay conducted on  
797 semi-solid agar plates grown at 37°C for 24 h. Swimming plate quantification of three  
798 biological replicates. Statistics calculated using Student's t-test relative to Wild-type. \*\*\*,  
799 P-value <0.001. **C.** CPS assays conducted of strains of interest. Colonies grown on  
800 Congo red plates for 48 h at 30°C prior to imaging.

801 **Figure S9.** Phenotype of *qrr2* single deletion mutant. **A.** CPS production Strains of  
802 interest were inoculated on congo red plates and incubated for 48 hours at 30°C. Wild  
803 Type RIMD2210633 was used as a positive control and  $\Delta opaR$  was used as a negative  
804 control. **B.** Swarming motility. Strains of interest were inoculated on swarming plates  
805 and incubated for 48 hours at 30°C.

806 **Figure S10:** DNA affinity pull-down of *qrr2* regulatory region (+) used to identify  
807 candidate regulators. Increasing concentrations of NaCl used to elute bound proteins.  
808 VP1624 coding region used as negative control bait DNA (-). Adjacent elutions used for  
809 comparison purposes. Boxes indicate chosen bands sent for Mass Spectrometry  
810 analysis. Boxes labeled N chosen to eliminate cross-over.

811 **Figure S11:** List of candidates identified in DNA affinity pull-down. Candidates  
812 divided into three categories, based on previously determined function. Fis is  
813 highlighted in red, as the target candidate in this study.

814

815

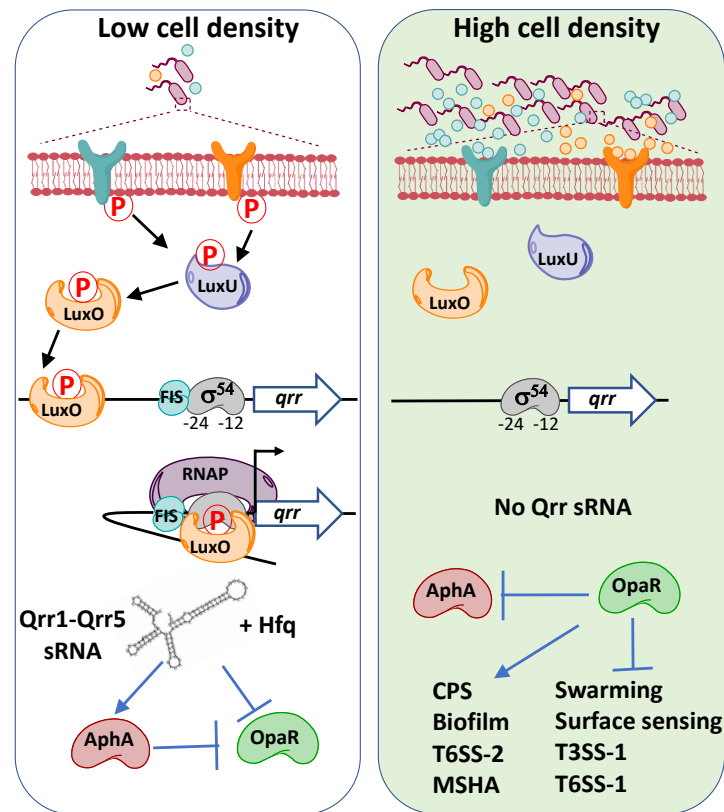

**Figure 1.** *Vibrio parahaemolyticus* quorum sensing pathway. Autoinducers (AIs) are synthesized internally by three synthases and then excreted outside the cell. At low cell density, three histidine-kinase receptors are free of AIs, therefore act as kinases, phosphorylating LuxU and ultimately LuxO. LuxO-P activates RpoN and, along with Fis positively regulates transcription of five small quorum regulatory RNAs (Qrr sRNAs). The Qrr sRNAs, along with Hfq, stabilize *aphA* transcripts and destabilize *opaR* transcripts. In addition, AphA is a negative regulator of *opaR* expression. At high cell density, LuxO is unphosphorylated and inactive, no *qrrs* are transcribed, *opaR* is expressed and *aphA* is repressed. OpaR positively regulates capsule polysaccharide production (CPS), biofilm formation, type 6 secretion system-1, and the type IV pilin MSHA, among other genes. OpaR negatively regulates swarming motility, surface sensing and two contact dependent secretion systems T3SS-1 and T6SS-1.



### A. CPS production and colony morphology in QS mutants

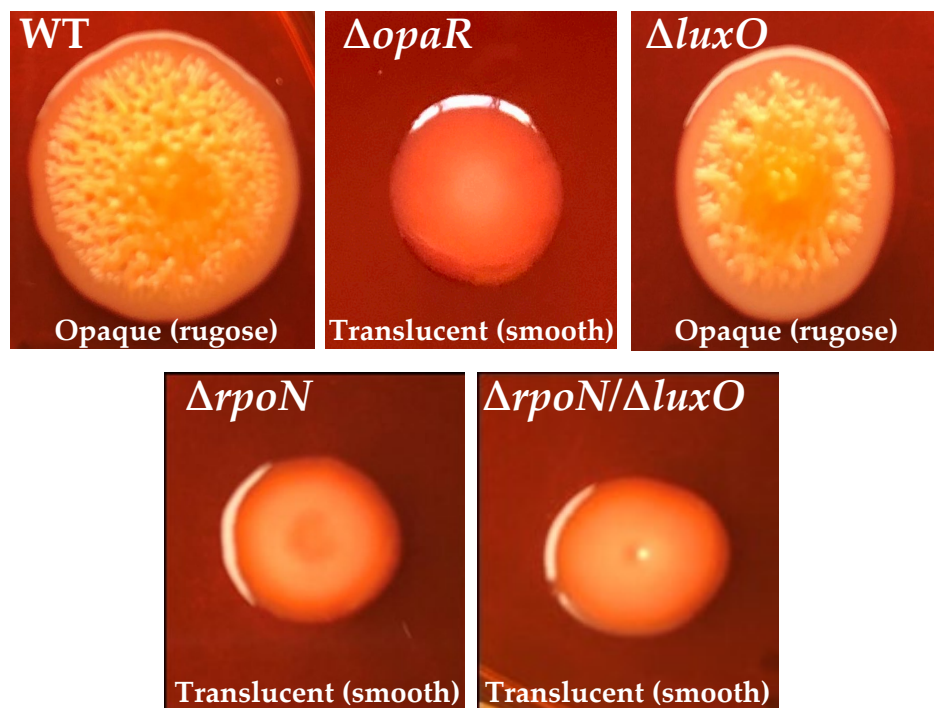

### B. Biofilm quantification of QS mutants

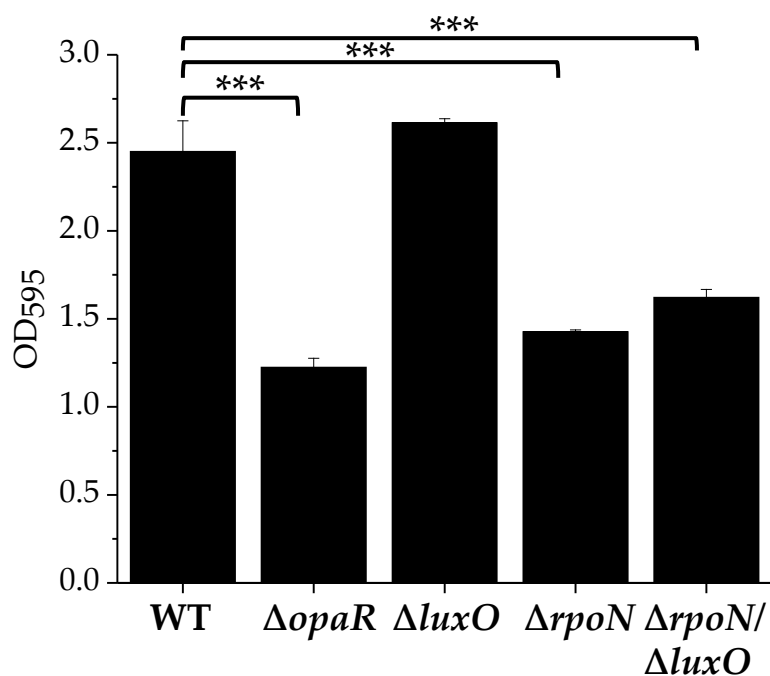

**Figure 2:** A. Wild type (WT) and QS mutant strains production of capsule polysaccharide (CPS) and colony morphology on Congo red plates. B. Biofilm assay from cultures grown for 24 hrs, stagnant and stained with crystal violet. Images are representatives from three bio-reps. Biofilm quantification of three bio-reps in duplicate. Statistics calculated using a Student's t-test. \*\*\*, P-value <0.001

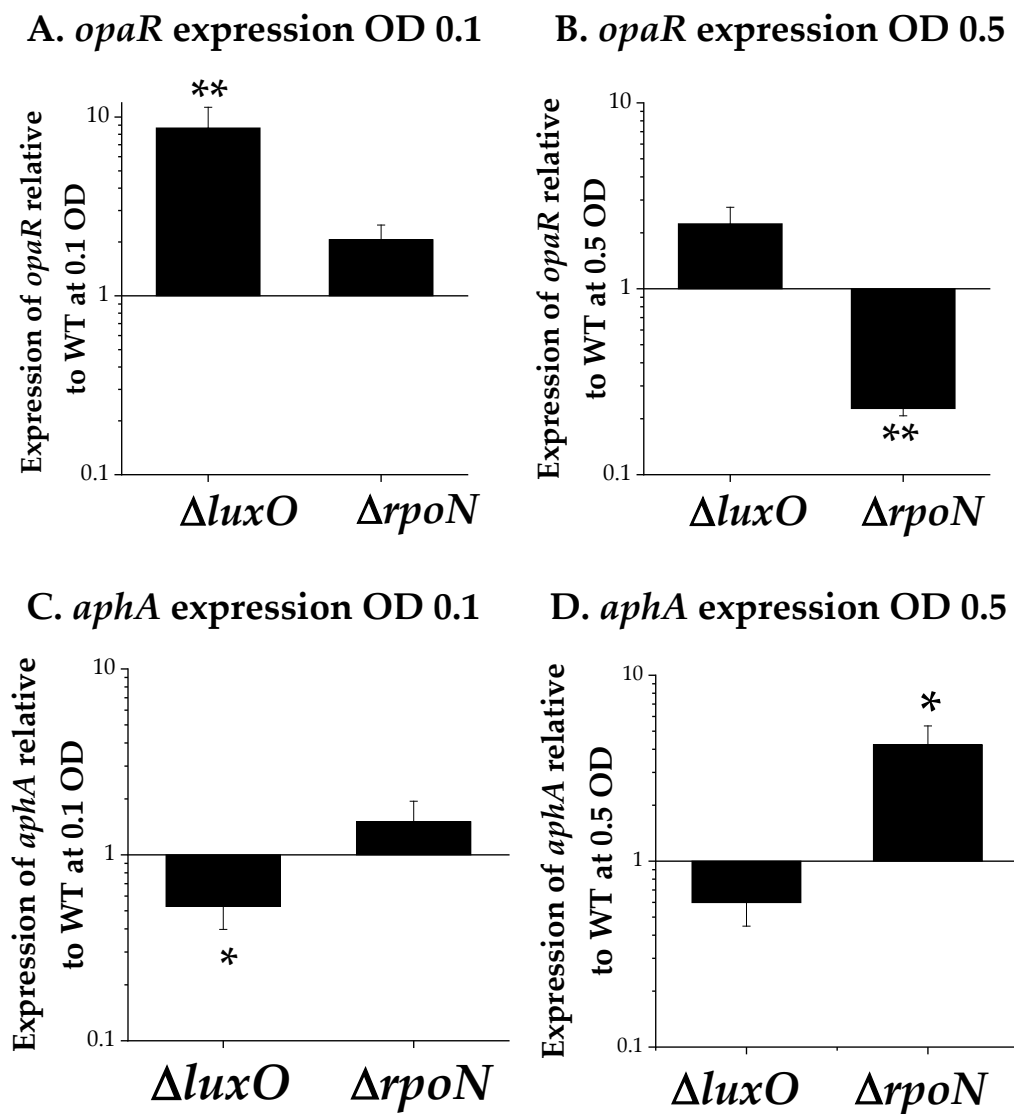

**Figure 3:** Quantitative real time PCR expression analysis of cells grown to 0.1 (A, C) or 0.5 OD (B, D) in LB media supplemented with 3% NaCl. Expression of *opaR* and *aphA* relative to WT RIMD2210633 and normalized to 16S housekeeping gene. Means and standard error of at least two biological replicates shown. Statistics calculated using a Student's t-test. \*, P-value <0.05; \*\*, P-value <0.01.

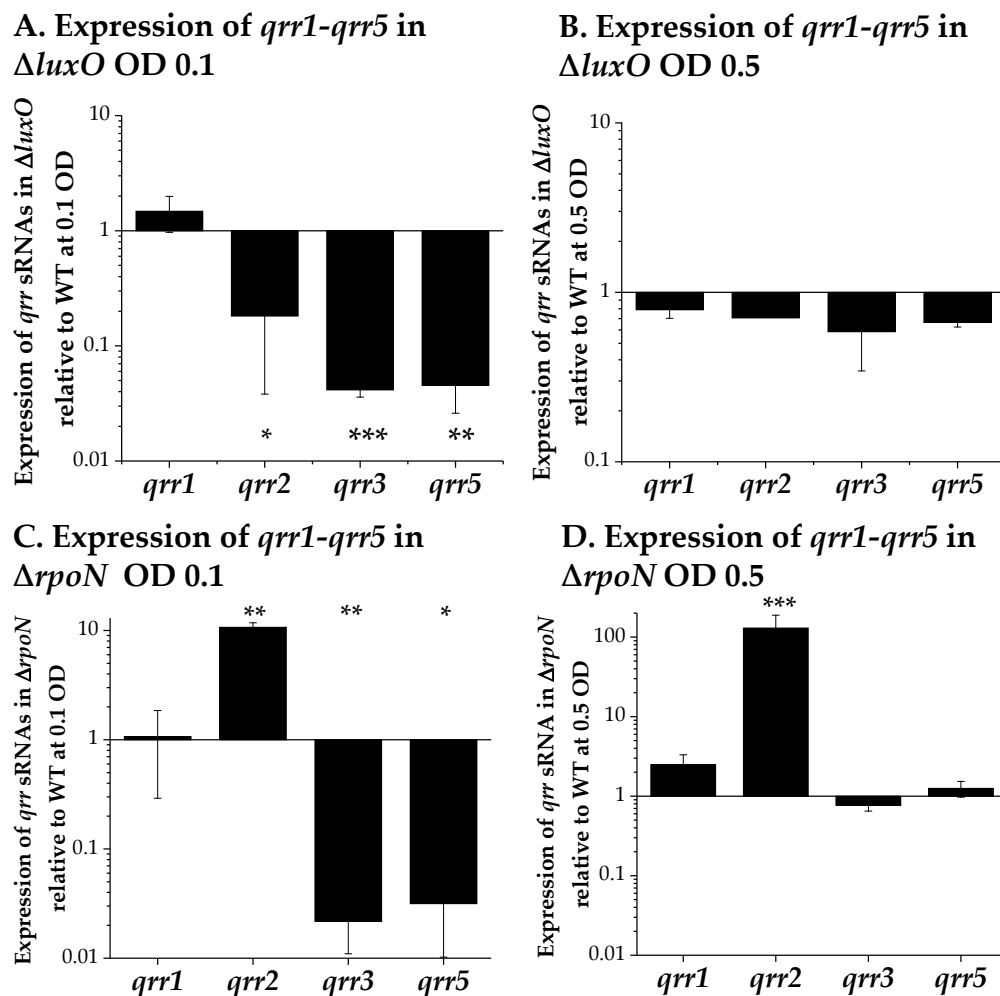

**Figure 4:** Quantitative real time PCR expression analysis of cells grown to 0.1 (A, C) or 0.5 OD (B, D) in LB media supplemented with 3% NaCl. Expression of *qrr1*-5 relative to wild type RIMD2210633 and normalized to 16S housekeeping gene. Expression of *qrr4* not detected in mutant strains. Means and standard error of at least two biological replicates shown. Statistics calculated using a Student's t-test. \*, P-value <0.05; \*\*, P-value <0.01; \*\*\*, P-value <0.001.

### A. *Pqrr2-gfp* expression in $\Delta luxO$ and $\Delta rpoN$ mutants

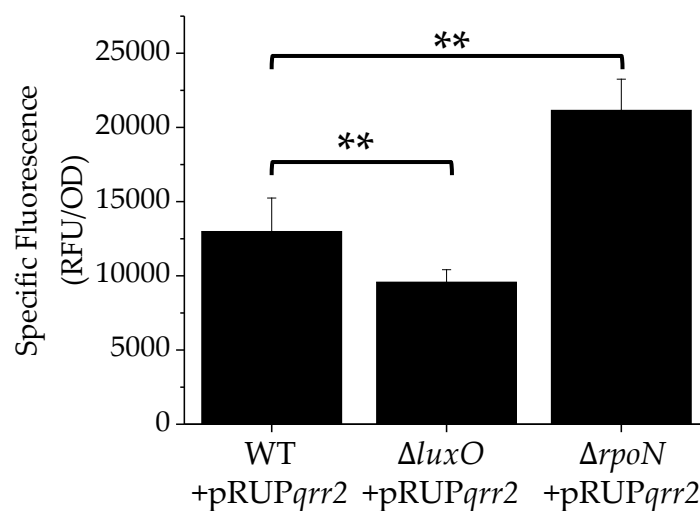

### B. *PopaR-gfp* expression in $\Delta qrr2$ mutant and quadruple $\Delta qrr1,3,4,5$ mutant

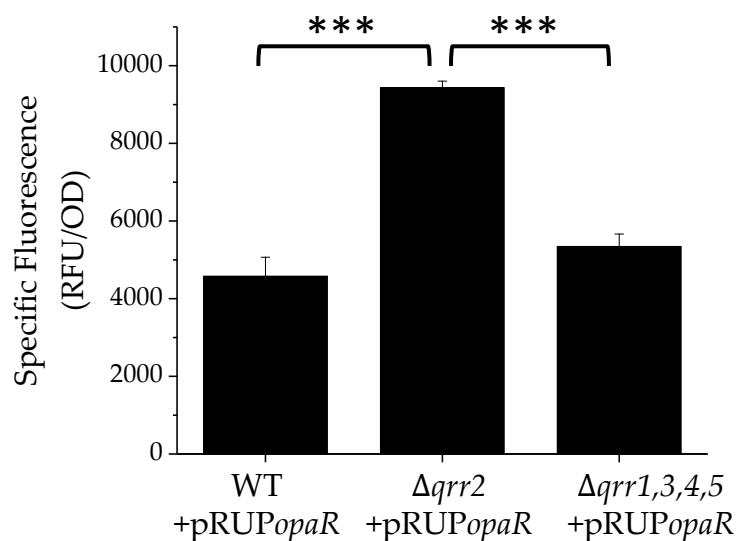

**Figure 5:** A. *Pqrr2-gfp* reporter assay of *qrr2* in *luxO* and *rpoN* mutants. B. *PopaR-gfp* reporter assays in a single *qrr2* deletion mutant and a quadruple mutant with only *qrr2* present. Cultures grown for 20 hrs in LB 3% NaCl. Means and standard error of at least three biological replicates shown. Statistics calculated using a one-way ANOVA and Tukey-Kramer *post-hoc* test. \*\*, P-value <0.01

### A. Putative sigma-70 -10 -35 promoter present in *qrr2* regulatory region

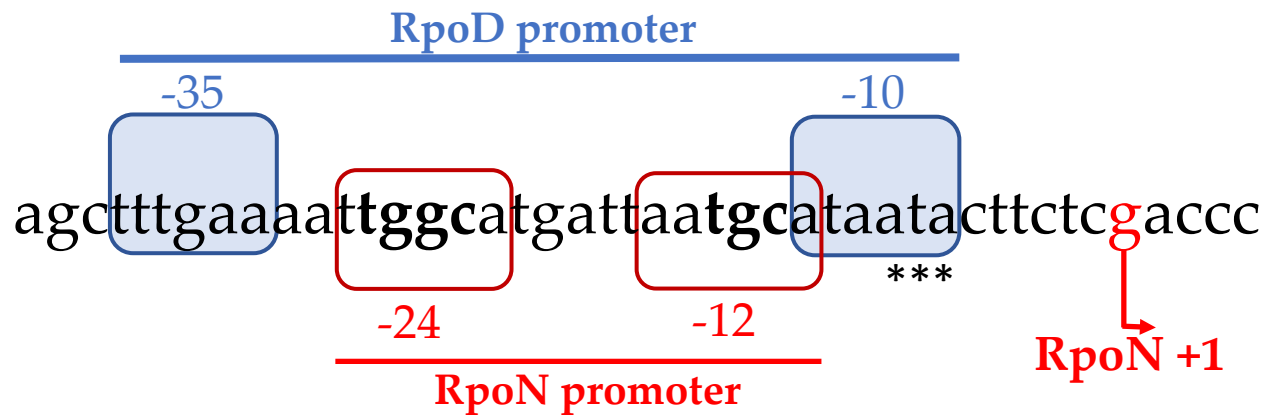

### B. Mutation of putative sigma-70 -10 promoter site and expression of *qrr2*

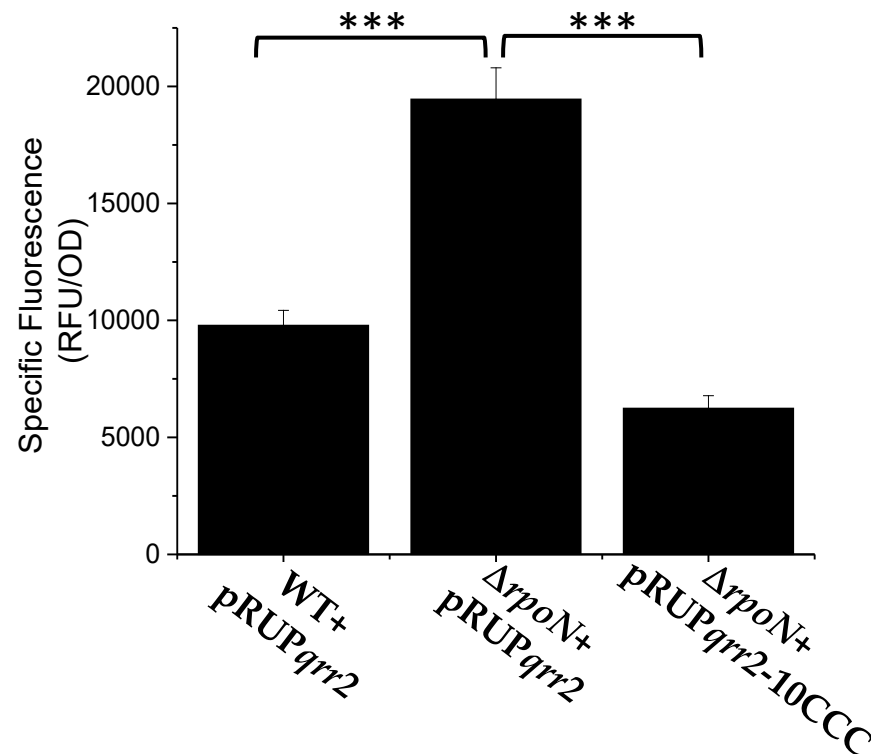

**Figure 6:** A. Analysis of *qrr2* regulatory region indicates overlapping sigma-54 and sigma-70 promoters. B. *P<sub>qrr2</sub>* GFP reporter assay of *qrr2* in Δ*rpoN* relative to wild type and mutated putative -10 RpoD binding site are indicated by asterisks. Means and standard error of three biological replicates shown. Statistics calculated using a one-way ANOVA and Tukey-Kramer *post-hoc* test. \*\*\*, P-value <0.001

### A. Fis binding sites present in *qrr2* regulatory region

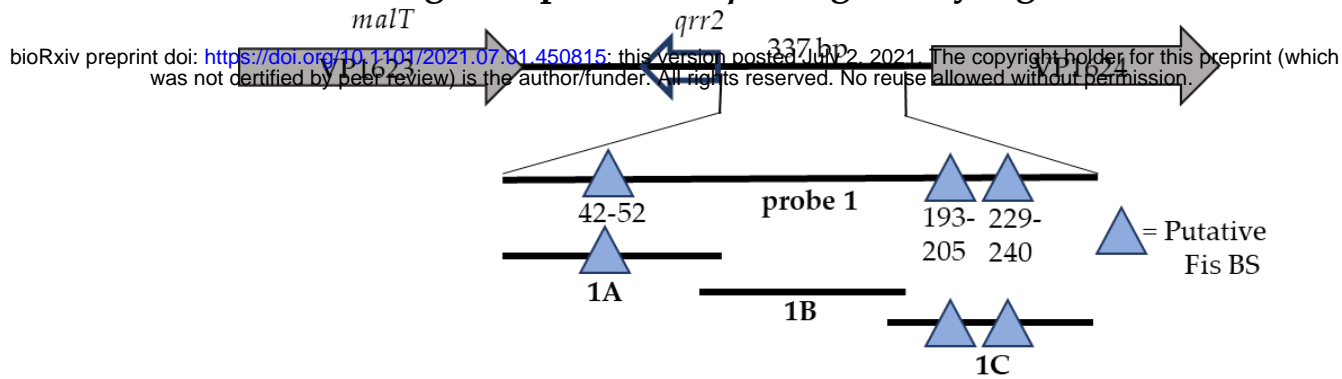

### B. Fis binds adjacent to *qrr2* promoter region

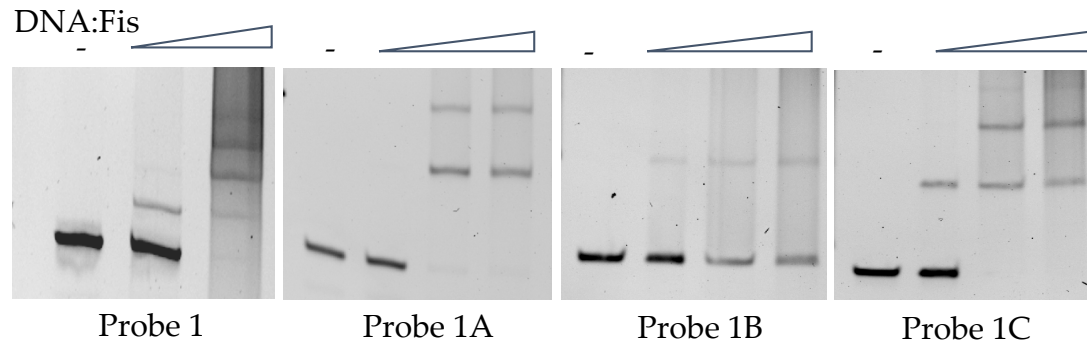

### C. RpoN and Fis repress *qrr2* transcription

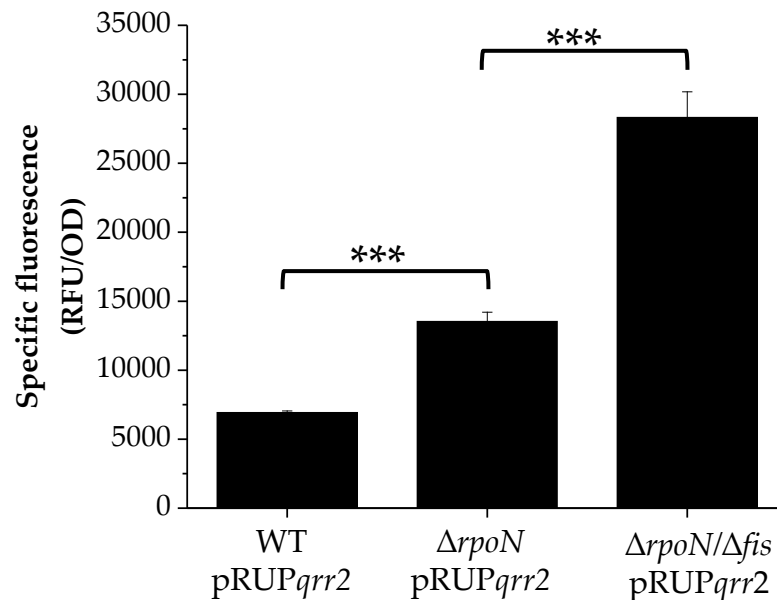

**Figure 7:** **A.** Regulatory region of *qrr2*. Lines represent EMSA probes and blue triangles represent putative Fis binding sites using Virtual Footprint prediction software. Numbers indicate Fis binding site distance from *qrr2* transcriptional start site. **B.** Electrophoretic mobility shift assays of P*qrr2* with purified Fis protein using four *qrr2* regulatory region DNA probes. **C.** pRUP*qrr2* reporter assays in  $\Delta rpoN$  and  $\Delta rpoN/\Delta fis$  deletion mutants relative to WT. Cultures grown for 20 hrs in LB 3% NaCl. Means and standard error of at least three biological replicates shown. Statistics calculated using a one-way ANOVA and Tukey-Kramer *post-hoc* test. \*\*\*, P-value <0.001.

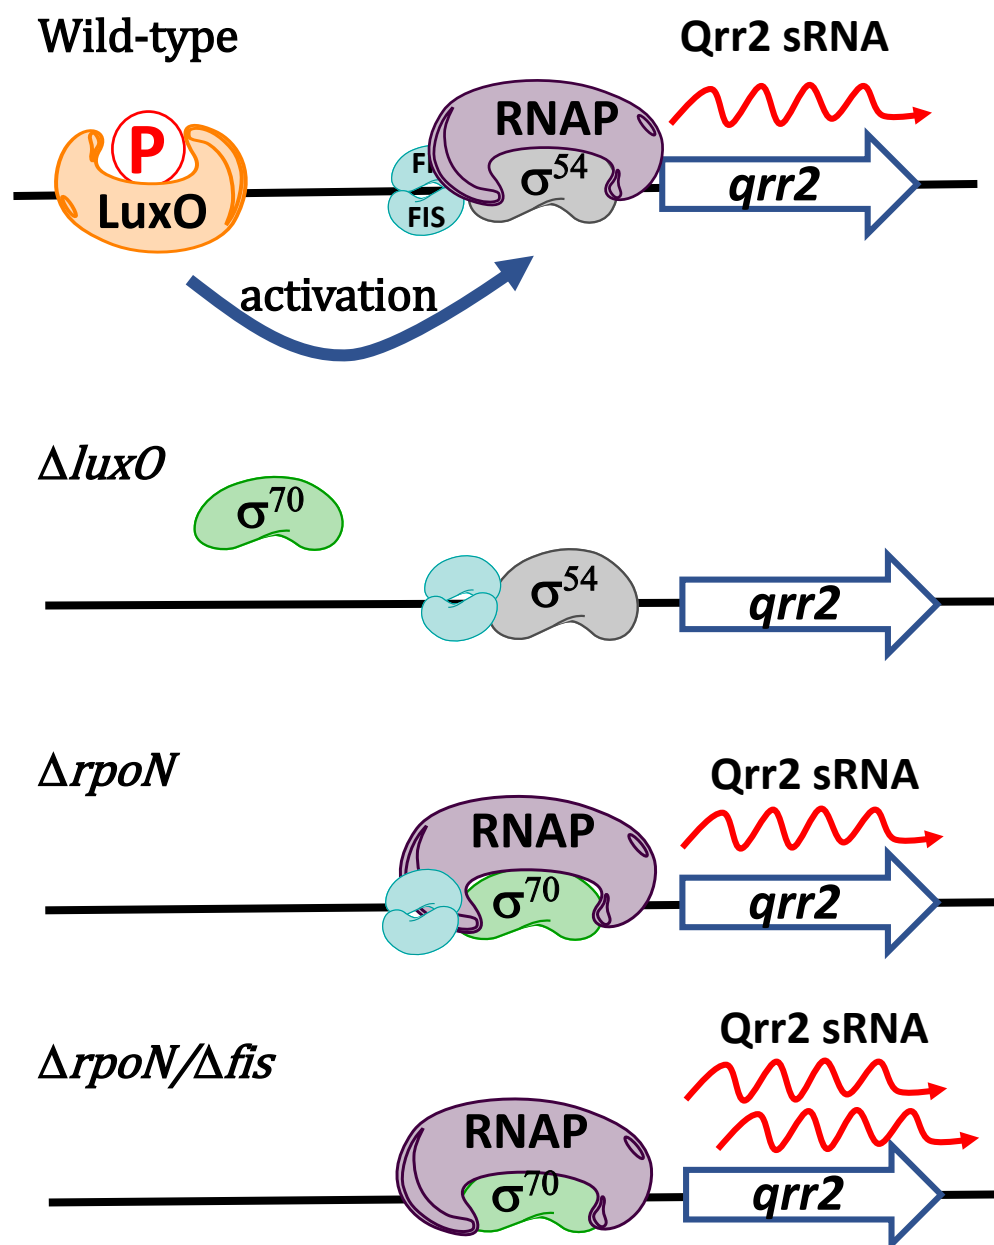

**Figure 8:** Model for *qrr2* transcription in the  $\Delta luxO$  and  $\Delta rpoN$  mutants. In the  $\Delta luxO$  mutant, RpoN is bound to the *qrr2* -24 -12 promoter region, causing sigma-70 occlusion. We propose that in the absence of RpoN (sigma-54), RpoD (sigma-70) can bind to the *qrr2* -35 -10 promoter region to initiate transcription. Transcription by RpoD is increased further upon removal of Fis, as in the  $\Delta rpoN/\Delta fis$  mutant.
